# Supplementary material for: Pathogenesis of FOLFOX induced sinusoidal obstruction syndrome in a murine chemotherapy model
Source: PubMed Central journal article supplement (PMC3710969; doi:10.1016/j.jhep.2013.04.014), 2013-08
Supplement: mmc1.pdf [file mmc1.pdf]

**A**

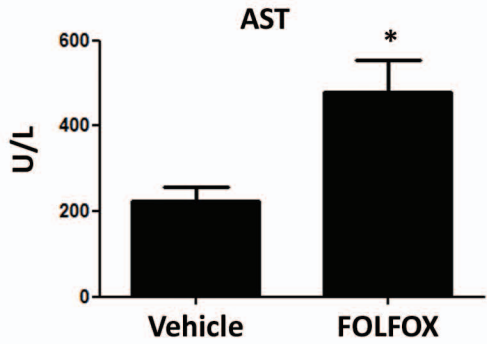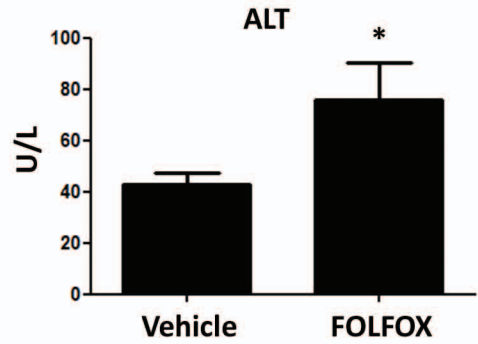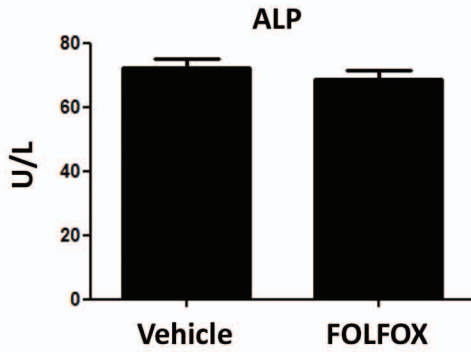

**B**

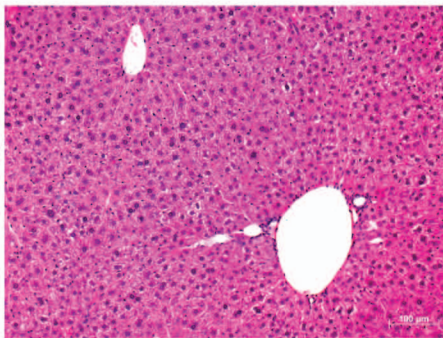

**Vehicle**

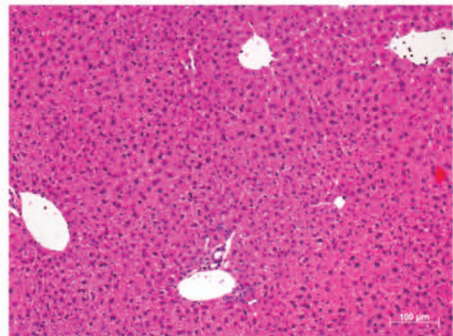

**FOLFOX**
