# Supplementary material for: Pathogenesis of FOLFOX induced sinusoidal obstruction syndrome in a murine chemotherapy model
Source: PubMed Central journal article supplement (PMC3710969; doi:10.1016/j.jhep.2013.04.014), 2013-08

**A**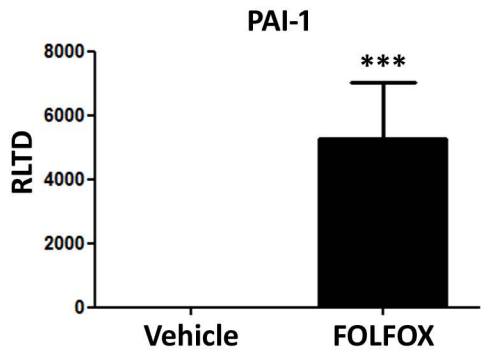**B**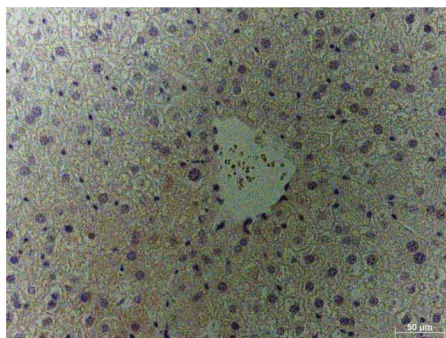**Vehicle**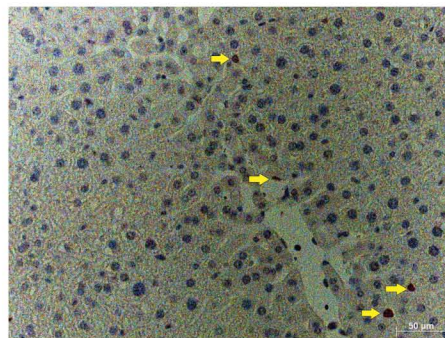**FOLFOX****C**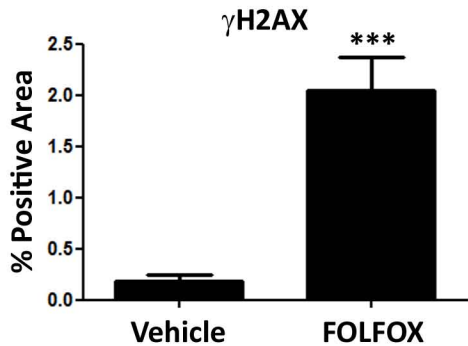

Supplement: mmc2.pdf [file mmc2.pdf]
