# Supplementary material for: Pathogenesis of FOLFOX induced sinusoidal obstruction syndrome in a murine chemotherapy model
Source: PubMed Central journal article supplement (PMC3710969; doi:10.1016/j.jhep.2013.04.014), 2013-08

**A**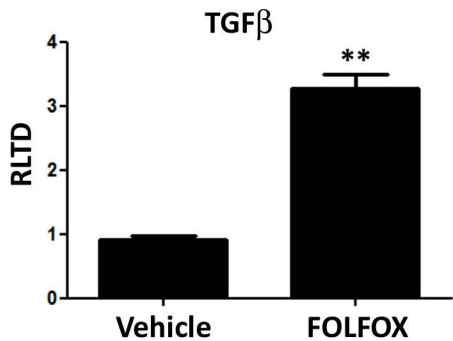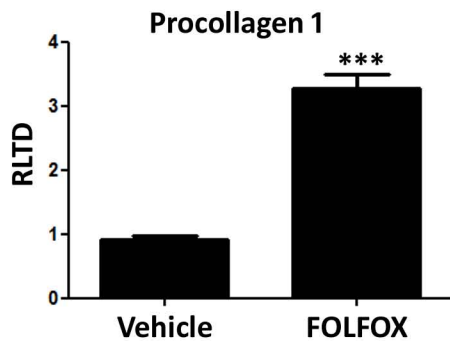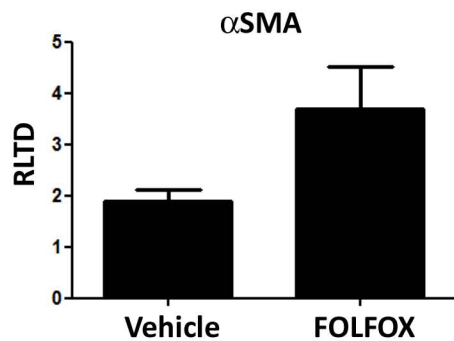**B**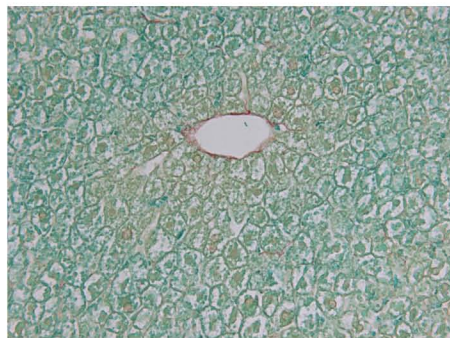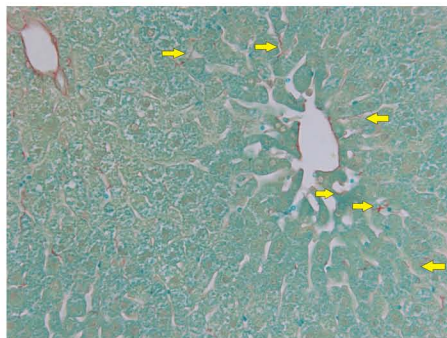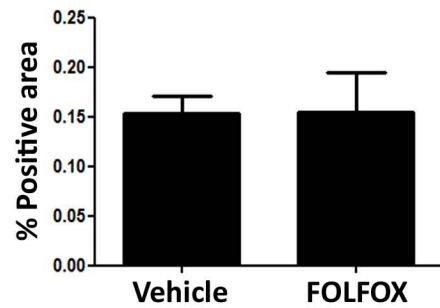

Supplement: mmc6.pdf [file mmc6.pdf]
