# Supplementary material for: Pathogenesis of FOLFOX induced sinusoidal obstruction syndrome in a murine chemotherapy model
Source: PubMed Central journal article supplement (PMC3710969; doi:10.1016/j.jhep.2013.04.014), 2013-08
Supplement: mmc7.pdf [file mmc7.pdf]

| Product             | Forward Primer Sequence | Reverse Primer Sequence     |
|---------------------|-------------------------|-----------------------------|
| PAI-1               | gatgctatgggattcaaagtca  | tccacctgttcacatagtct        |
| p21 <sup>Cip1</sup> | atgtccaatcctgggatgt     | tgcagcagggcagaggaagt        |
| TXN1                | catgccgacctccagttta     | ttcctgttagcaccggaga         |
| NQO1                | tggccgaacacaagaagctg    | tgggaactgaaatatacaccaggt    |
| CXCL1               | ggctgggattcacctcaag     | gcgaccattctgagtggtg         |
| CXCL2               | ccaaccaccaggctacagg     | gcgtcacactcaagctctg         |
| MCP-1               | aggccctgtcatgcttctg     | tctggaccattccttctg          |
| IL-6                | gaggataccactccaacagacc  | aagtgcatacatcggtgtcataca    |
| Factor X            | gccctaaacaccagcgacagt   | gccaccacaatccgaacaag        |
| PAR-1               | gggtctcattggcttttcta    | tgcttcttctgggtgtcc          |
| PAR-2               | ctgctgtttgtggttggtga    | cccagttgtgccattgagat        |
| vWF                 | cgggaagagtgtgatggttgac  | agcatctcccacagcattcacc      |
| VEGF-A              | ccccgacgagatagagta      | gctttggtgaggttgat           |
| VEGF-B              | gccagacaggggtgccatac    | ggagtgggatggatgatgtcag      |
| VEGF-C              | cctgggaaatgtcctgtgaat   | tgggacacagcggcacttct        |
| ANG1                | cacataggggtgcagcaacca   | cgctcgttctggaagaatga        |
| ANG2                | cagccacggtcaacaactc     | cttcttacggatagcaaccgag      |
| TIE2                | cggccaggtacataggaggaa   | tcacatctccgaacaatcagc       |
| VEGFR-1             | ccacctctatccgctgg       | accaatgtgtaaccgtcttatt      |
| VEGFR-2             | caaacctcaatgtgtctcttgc  | agagtaaagcctatctcgtgt       |
| Metallothionein 1   | gctgctgctcctgctgtccc    | cagcacgtgcactgttccgc        |
| Apolipoprotein A4   | aaagtaaccagacgttcggg    | cgctggatgtatggggcag         |
| Cyp17a1             | gccaagtcaagacacctaata   | gtaccagggcgaagagaataga      |
| SOCS2               | agttcgcattcagactacctact | tggactcaatccgcagggttag      |
| Cyp4a12b            | ggggagatcagacccaaaagc   | attcgtcgggtgctgaaacat       |
| THrsp               | atgcaagtgtcaacgaaacgc   | cctgccattcctccttgg          |
| ELOVL3              | ttctcacgcggttaaaaaatgg  | gagcaacagatagacgaccac       |
| Cyp2a5              | tggctcctgtattaccatctacc | actacgccatagcctttgaaaa      |
| ELOVL6              | gaaaagcagttcaacgagaacg  | agatgccgaccaccaagata        |
| STAT3               | ctggcaccttgattgagagtc   | gaaggtgtgctgatagaggac       |
| SOD3                | ccttctgttctacggcttgc    | tcgcctatcttcaaccagg         |
| HO1                 | gatagagcgcaacaagcagaa   | cagtgaggccataccagaag        |
| MMP9                | tcacttcccttcacctcg      | caaagatgaacgggaacaca        |
| TGFβ                | cccgaacccccattgctgtcc   | aggcgtatcagtgggggtcag       |
| ProColl1            | ttcacctacagcagcgttgtg   | gatgactgtcttccccaaagt       |
| αSMA                | tcagcgctccagttcct       | aaaaaaaaaccacgagtaacaaatcaa |
| HES6                | accacctgctagaatccatgc   | gcaccggtttagttcagc          |
| GAPDH               | gcacagtcaaggccgagaat    | gccttctccatggtggtgaa        |

**Supplementary Table 1. Primer Sequences for qRT-PCR.**
