# Supplementary material for: Pathogenesis of FOLFOX induced sinusoidal obstruction syndrome in a murine chemotherapy model
Source: PubMed Central journal article supplement (PMC3710969; doi:10.1016/j.jhep.2013.04.014), 2013-08
Supplement: mmc8.pdf [file mmc8.pdf]

| <b>Target</b> | <b>Concentration</b> | <b>Supplier</b>               | <b>Catalogue No.</b> |
|---------------|----------------------|-------------------------------|----------------------|
| Total p53     | 1:1000               | Abcam                         | 31333                |
| p-p53         | 1:1000               | Cell Signalling<br>Technology | 9284                 |
| p21           | 1:1000               | Abcam                         | 7960                 |
| NRF2          | 1:1000               | Abcam                         | 31163                |
| Total STAT3   | 1:1000               | Cell Signalling<br>Technology | 9132                 |
| p-STAT3       | 1:1000               | Cell Signalling<br>Technology | 9131                 |
| P21(Cip1)     | 1:1000               | Abcam                         | 7960                 |
| p-JNK         | 1:1000               | Cell Signalling<br>Technology | 4668                 |
| Total JNK     | 1:1000               | Cell Signalling<br>Technology | 9252                 |
| SOD3          | 1:500                | Abcam                         | 80946                |
| GAPDH         | 1:2500               | Abcam                         | 22555                |

**Supplementary Table 2. Antibodies for Western blot.**
