# Supplementary material for: Pathogenesis of FOLFOX induced sinusoidal obstruction syndrome in a murine chemotherapy model
Source: PubMed Central journal article supplement (PMC3710969; doi:10.1016/j.jhep.2013.04.014), 2013-08
Supplement: mmc9.pdf [file mmc9.pdf]

| <b>Target</b>       | <b>Antigen Retrieval</b> | <b>Concentration</b> | <b>Supplier</b>               | <b>Catalogue No.</b> |
|---------------------|--------------------------|----------------------|-------------------------------|----------------------|
| p21 <sup>Cip1</sup> | Citric Saline            | 1:100                | Abcam                         | 2961                 |
| γH2AX               | EDTA pH8                 | 1:100                | Cell Signalling<br>Technology | 9718                 |
| pSTAT3              | EDTA pH8                 | 1:400                | Cell Signalling<br>Technology | 9145                 |
| Tissue Factor       | Citric Saline            | 1:100                | Abcam                         | 104513               |
| PCNA                | Trypsin                  | 1:250                | Abcam                         | 2426                 |

**Supplementary Table 3. Antibodies for immunohistochemistry**
