# Supplementary material for: Pathogenesis of FOLFOX induced sinusoidal obstruction syndrome in a murine chemotherapy model
Source: PubMed Central journal article supplement (PMC3710969; doi:10.1016/j.jhep.2013.04.014), 2013-08
Supplement: mmc10.pdf [file mmc10.pdf]

|                                       | Vehicle (n=9) | FOLFOX (n=9) | p-Value     |
|---------------------------------------|---------------|--------------|-------------|
| <b>Rubbia-Brandt Grade</b>            |               |              |             |
| 0                                     | 9             | 0            | p < 0.0001* |
| 1                                     | 0             | 9            |             |
| 2                                     | 0             | 0            |             |
| 3                                     | 0             | 0            |             |
| <b>Endothelial Disruption Present</b> | 0             | 9            | p < 0.0001  |

\* = Fishers exact test comparing sinusoidal dilatation absent vs. present

**Supplementary Table 4. Histological scoring of H&E stained sections from FOLFOX treated animals and respective Vehicle Controls (n=9 per group)**
