# Supplementary material for: Pathogenesis of FOLFOX induced sinusoidal obstruction syndrome in a murine chemotherapy model
Source: PubMed Central journal article supplement (PMC3710969; doi:10.1016/j.jhep.2013.04.014), 2013-08
Supplement: mmc11.pdf [file mmc11.pdf]

| p (Corr) | p        | FC (abs) | Regulation | Symbol       | Entrez_Gene_ID | Definition                                                                                                                       |
|----------|----------|----------|------------|--------------|----------------|----------------------------------------------------------------------------------------------------------------------------------|
| 2.13E-04 | 1.08E-06 | 16.9     | up         | S100a8       | 20201          | Mus musculus S100 calcium binding protein A8 (calgranulin A) (S100a8), mRNA.                                                     |
| 6.17E-06 | 3.40E-09 | 12.4     | up         | Mt1          | 17748          | Mus musculus metallothionein 1 (Mt1), mRNA.                                                                                      |
| 4.35E-06 | 1.96E-09 | 12.0     | up         | Apoa4        |                |                                                                                                                                  |
| 7.33E-05 | 1.51E-07 | 9.2      | up         | Lcn2         | 16819          | Mus musculus lipocalin 2 (Lcn2), mRNA.                                                                                           |
| 4.21E-07 | 8.44E-11 | 8.3      | up         | Apoa4        | 11808          | Mus musculus apolipoprotein A-IV (Apoa4), mRNA.                                                                                  |
| 0.001162 | 1.74E-05 | 8.3      | up         | S100a9       | 20202          | Mus musculus S100 calcium binding protein A9 (calgranulin B) (S100a9), mRNA.                                                     |
| 1.94E-05 | 1.73E-08 | 8.2      | up         | Cdkn1a       | 12575          | Mus musculus cyclin-dependent kinase inhibitor 1A (P21) (Cdkn1a), mRNA.                                                          |
| 1.09E-04 | 3.29E-07 | 7.3      | up         | Cyp17a1      | 13074          | Mus musculus cytochrome P450, family 17, subfamily a, polypeptide 1 (Cyp17a1), mRNA.                                             |
| 1.89E-08 | 9.46E-13 | 6.9      | up         | Apoa4        | 11808          | Mus musculus apolipoprotein A-IV (Apoa4), mRNA.                                                                                  |
| 0.001459 | 2.54E-05 | 6.4      | up         | Socs2        | 216233         | Mus musculus suppressor of cytokine signaling 2 (Socs2), mRNA.                                                                   |
| 0.031881 | 0.003732 | 6.4      | up         | LOC100047788 | 100047788      | PREDICTED: Mus musculus similar to gamma-2a immunoglobulin heavy chain (LOC100047788), misc RNA.                                 |
| 0.001971 | 4.26E-05 | 6.3      | up         | Igk-C        |                |                                                                                                                                  |
| 4.22E-05 | 6.56E-08 | 5.9      | up         | Serpina7     | 331535         | Mus musculus serine (or cysteine) peptidase inhibitor, clade A (alpha-1 antiproteinase, antitrypsin), member 7 (Serpina7), mRNA. |

|          |          |     |    |              |           |                                                                                                                                                                              |
|----------|----------|-----|----|--------------|-----------|------------------------------------------------------------------------------------------------------------------------------------------------------------------------------|
| 0.003601 | 1.19E-04 | 5.5 | up | LOC100047628 | 100047628 | PREDICTED: Mus musculus similar to Chain L, Structural Basis Of Antigen Mimicry In A Clinically Relevant Melanoma Antigen System, transcript variant 3 (LOC100047628), mRNA. |
| 0.011811 | 7.92E-04 | 5.5 | up | Cyp4a14      | 13119     | Mus musculus cytochrome P450, family 4, subfamily a, polypeptide 14 (Cyp4a14), mRNA.                                                                                         |
| 9.60E-05 | 2.53E-07 | 5.3 | up | Slc1a4       | 55963     | Mus musculus solute carrier family 1 (glutamate/neutral amino acid transporter), member 4 (Slc1a4), mRNA.                                                                    |
| 4.35E-06 | 1.84E-09 | 4.3 | up | Cdkn1a       | 12575     | Mus musculus cyclin-dependent kinase inhibitor 1A (P21) (Cdkn1a), mRNA.                                                                                                      |
| 9.94E-04 | 1.38E-05 | 4.3 | up | Gpr120       | 107221    | Mus musculus G protein-coupled receptor 120 (Gpr120), mRNA.                                                                                                                  |
| 3.97E-07 | 4.26E-11 | 4.2 | up | Prtn3        | 19152     | Mus musculus proteinase 3 (Prtn3), mRNA.                                                                                                                                     |
| 4.00E-05 | 5.62E-08 | 4.1 | up | Fgl1         | 234199    | Mus musculus fibrinogen-like protein 1 (Fgl1), mRNA.                                                                                                                         |
| 3.29E-04 | 2.47E-06 | 4.1 | up | Slc16a5      | 217316    | Mus musculus solute carrier family 16 (monocarboxylic acid transporters), member 5 (Slc16a5), mRNA.                                                                          |
| 0.007526 | 4.02E-04 | 4.0 | up | Gdf15        | 23886     | Mus musculus growth differentiation factor 15 (Gdf15), mRNA.                                                                                                                 |
| 0.005794 | 2.57E-04 | 3.9 | up | Igh-VJ558    | 16061     | PREDICTED: Mus musculus immunoglobulin heavy chain (J558 family) (Igh-VJ558), mRNA.                                                                                          |
| 0.005645 | 2.47E-04 | 3.9 | up | Ltf          | 17002     | Mus musculus lactotransferrin (Ltf), mRNA.                                                                                                                                   |
| 0.017368 | 0.001453 | 3.8 | up | Ighg         | 380794    | PREDICTED: Mus musculus Immunoglobulin heavy chain (gamma polypeptide), transcript variant 1 (Ighg), mRNA.                                                                   |
| 0.042128 | 0.005615 | 3.7 | up | Acot3        | 171281    | Mus musculus acyl-CoA thioesterase 3 (Acot3), mRNA.                                                                                                                          |
| 0.018607 | 0.001641 | 3.7 | up | Egr1         | 13653     | Mus musculus early growth response 1 (Egr1), mRNA.                                                                                                                           |
| 4.82E-05 | 7.74E-08 | 3.6 | up | Apcs         | 20219     | Mus musculus serum amyloid P-component (Apcs), mRNA.                                                                                                                         |
| 0.001157 | 1.72E-05 | 3.6 | up | Nt5e         | 23959     | Mus musculus 5' nucleotidase, ecto (Nt5e), mRNA.                                                                                                                             |
| 2.89E-05 | 3.48E-08 | 3.3 | up | Serpina7     |           |                                                                                                                                                                              |
| 0.001    | 1.40E-05 | 3.3 | up | LOC211591    |           |                                                                                                                                                                              |
| 0.00368  | 1.25E-04 | 3.3 | up | Cxcl1        | 14825     | Mus musculus chemokine (C-X-C motif) ligand 1 (Cxcl1), mRNA.                                                                                                                 |
| 0.003489 | 1.12E-04 | 3.3 | up | Igfbp1       | 16006     | Mus musculus insulin-like growth factor binding protein 1 (Igfbp1), mRNA.                                                                                                    |
| 2.43E-04 | 1.29E-06 | 3.3 | up | Angptl3      | 30924     | Mus musculus angiopoietin-like 3 (Angptl3), mRNA.                                                                                                                            |

|          |          |     |    |               |        |                                                                                                                                                    |
|----------|----------|-----|----|---------------|--------|----------------------------------------------------------------------------------------------------------------------------------------------------|
| 7.60E-07 | 1.90E-10 | 3.3 | up | Pkm2          | 18746  | Mus musculus pyruvate kinase, muscle (Pkm2), mRNA. XM_979725<br>XM_979753 XM_979779 XM_979805 XM_979833 XM_979863 XM_979890<br>XM_979922 XM_979949 |
| 5.16E-05 | 8.79E-08 | 3.1 | up | Prlr          | 19116  | Mus musculus prolactin receptor (Prlr), mRNA.                                                                                                      |
| 8.32E-06 | 5.42E-09 | 3.1 | up | Pfkl          | 18641  | Mus musculus phosphofructokinase, liver, B-type (Pfkl), mRNA.                                                                                      |
| 1.90E-04 | 8.94E-07 | 3.1 | up | Tm4sf4        | 229302 | Mus musculus transmembrane 4 superfamily member 4 (Tm4sf4), mRNA.                                                                                  |
| 0.011063 | 7.10E-04 | 3.1 | up | Eraf          | 170812 | Mus musculus erythroid associated factor (Eraf), mRNA.                                                                                             |
| 0.006333 | 2.99E-04 | 3.1 | up | Efna1         | 13636  | Mus musculus ephrin A1 (Efna1), mRNA.                                                                                                              |
| 0.00254  | 6.40E-05 | 3.1 | up | Acnat2        | 209186 | Mus musculus acyl-coenzyme A amino acid N-acyltransferase 2 (Acnat2),<br>mRNA.                                                                     |
| 6.26E-05 | 1.16E-07 | 3.0 | up | Serpina3f     | 238393 | Mus musculus serine (or cysteine) peptidase inhibitor, clade A, member 3F<br>(Serpina3f), mRNA.                                                    |
| 0.009044 | 5.27E-04 | 3.0 | up | 2310016C08Rik | 69573  | Mus musculus RIKEN cDNA 2310016C08 gene (2310016C08Rik), mRNA.                                                                                     |
| 2.73E-05 | 2.87E-08 | 3.0 | up | Rgs5          | 19737  | Mus musculus regulator of G-protein signaling 5 (Rgs5), mRNA.                                                                                      |
| 1.17E-05 | 8.82E-09 | 3.0 | up | Fgl1          |        |                                                                                                                                                    |
| 9.37E-04 | 1.22E-05 | 3.0 | up | St3gal5       | 20454  | Mus musculus ST3 beta-galactoside alpha-2,3-sialyltransferase 5 (St3gal5),<br>transcript variant 2, mRNA.                                          |
| 2.82E-05 | 3.11E-08 | 2.9 | up | Rgs4          | 19736  | Mus musculus regulator of G-protein signaling 4 (Rgs4), mRNA.                                                                                      |
| 1.69E-04 | 7.54E-07 | 2.9 | up | Lbp           | 16803  | Mus musculus lipopolysaccharide binding protein (Lbp), mRNA.                                                                                       |
| 4.77E-04 | 4.02E-06 | 2.8 | up | Asah3l        | 230379 | Mus musculus N-acylsphingosine amidohydrolase 3-like (Asah3l), mRNA.                                                                               |
| 0.003619 | 1.20E-04 | 2.8 | up | Nlrp12        | 378425 | PREDICTED: Mus musculus NLR family, pyrin domain containing 12 (Nlrp12),<br>mRNA.                                                                  |
| 0.049355 | 0.007089 | 2.8 | up | 8430408G22Rik | 213393 | Mus musculus RIKEN cDNA 8430408G22 gene (8430408G22Rik), mRNA.                                                                                     |
| 5.11E-04 | 4.51E-06 | 2.8 | up | Serpina3g     | 20715  | Mus musculus serine (or cysteine) peptidase inhibitor, clade A, member 3G<br>(Serpina3g), mRNA.                                                    |
| 1.21E-04 | 4.34E-07 | 2.7 | up | Slc4a4        | 54403  | Mus musculus solute carrier family 4 (anion exchanger), member 4 (Slc4a4),<br>mRNA.                                                                |
| 2.43E-04 | 1.30E-06 | 2.7 | up | Egln3         | 112407 | Mus musculus EGL nine homolog 3 (C. elegans) (Egln3), mRNA.                                                                                        |
| 1.12E-04 | 3.63E-07 | 2.7 | up | Il17rb        | 50905  | Mus musculus interleukin 17 receptor B (Il17rb), mRNA.                                                                                             |
| 1.83E-04 | 8.35E-07 | 2.6 | up | Adam23        | 23792  | Mus musculus a disintegrin and metallopeptidase domain 23 (Adam23),                                                                                |

|          |          |     |    |               |           | mRNA.                                                                                                           |
|----------|----------|-----|----|---------------|-----------|-----------------------------------------------------------------------------------------------------------------|
| 9.60E-05 | 2.34E-07 | 2.6 | up | Hspa2         | 15512     | Mus musculus heat shock protein 2 (Hspa2), transcript variant 2, mRNA.                                          |
| 4.38E-06 | 2.19E-09 | 2.6 | up | E030030K01Rik |           |                                                                                                                 |
| 0.032498 | 0.003832 | 2.6 | up | Gadd45g       | 23882     | Mus musculus growth arrest and DNA-damage-inducible 45 gamma (Gadd45g), mRNA.                                   |
| 0.001707 | 3.29E-05 | 2.6 | up | Siat9         |           |                                                                                                                 |
| 9.60E-05 | 2.59E-07 | 2.6 | up | Ifitm1        | 68713     | Mus musculus interferon induced transmembrane protein 1 (Ifitm1), mRNA.                                         |
| 2.04E-04 | 9.83E-07 | 2.5 | up | Nfkbiz        | 80859     | Mus musculus nuclear factor of kappa light polypeptide gene enhancer in B-cells inhibitor, zeta (Nfkbiz), mRNA. |
| 0.026214 | 0.00279  | 2.5 | up | Igl-V1        |           |                                                                                                                 |
| 0.004135 | 1.53E-04 | 2.5 | up | Cux2          | 13048     | Mus musculus cut-like homeobox 2 (Cux2), mRNA.                                                                  |
| 0.008971 | 5.16E-04 | 2.5 | up | Chac1         | 69065     | Mus musculus ChaC, cation transport regulator-like 1 (E. coli) (Chac1), mRNA.                                   |
| 9.62E-04 | 1.30E-05 | 2.5 | up | Lyz2          | 17105     | Mus musculus lysozyme 2 (Lyz2), mRNA.                                                                           |
| 0.008385 | 4.72E-04 | 2.5 | up | Vldlr         | 22359     | Mus musculus very low density lipoprotein receptor (Vldlr), mRNA.                                               |
| 0.009969 | 6.07E-04 | 2.5 | up | Ankrd37       | 654824    | Mus musculus ankyrin repeat domain 37 (Ankrd37), mRNA.                                                          |
| 3.97E-07 | 5.97E-11 | 2.4 | up | Phlda3        | 27280     | Mus musculus pleckstrin homology-like domain, family A, member 3 (Phlda3), mRNA.                                |
| 7.79E-05 | 1.64E-07 | 2.4 | up | 4833418A01Rik | 75763     | Mus musculus RIKEN cDNA 4833418A01 gene (4833418A01Rik), mRNA.                                                  |
| 2.50E-04 | 1.42E-06 | 2.4 | up | Hmox1         | 15368     | Mus musculus heme oxygenase (decycling) 1 (Hmox1), mRNA.                                                        |
| 0.002461 | 6.07E-05 | 2.4 | up | LOC100043257  | 100043257 | PREDICTED: Mus musculus similar to RNA binding motif protein 3 (LOC100043257), mRNA.                            |
| 3.93E-05 | 5.32E-08 | 2.3 | up | Cyp3a13       | 13113     | Mus musculus cytochrome P450, family 3, subfamily a, polypeptide 13 (Cyp3a13), mRNA.                            |
| 1.72E-04 | 7.75E-07 | 2.3 | up | Bsg           |           |                                                                                                                 |
| 3.19E-04 | 2.21E-06 | 2.3 | up | Akr1b8        | 14187     | Mus musculus aldo-keto reductase family 1, member B8 (Akr1b8), mRNA.                                            |
| 2.10E-04 | 1.04E-06 | 2.3 | up | Cyp3a13       | 13113     | Mus musculus cytochrome P450, family 3, subfamily a, polypeptide 13 (Cyp3a13), mRNA.                            |

|          |          |     |    |           |        |                                                                                              |
|----------|----------|-----|----|-----------|--------|----------------------------------------------------------------------------------------------|
| 9.60E-05 | 2.59E-07 | 2.3 | up | Serpina3m | 20717  | Mus musculus serine (or cysteine) peptidase inhibitor, clade A, member 3M (Serpina3m), mRNA. |
| 0.01916  | 0.001707 | 2.3 | up | Slc4a1    | 20533  | Mus musculus solute carrier family 4 (anion exchanger), member 1 (Slc4a1), mRNA.             |
| 1.25E-04 | 4.90E-07 | 2.3 | up | Stab2     | 192188 | Mus musculus stabilin 2 (Stab2), mRNA.                                                       |
| 4.08E-04 | 3.17E-06 | 2.3 | up | Ccdc80    | 67896  | Mus musculus coiled-coil domain containing 80 (Ccdc80), mRNA.                                |
| 0.002756 | 7.32E-05 | 2.3 | up | D1Ert471e |        |                                                                                              |
| 0.002967 | 8.28E-05 | 2.3 | up | Klf6      | 23849  | Mus musculus Kruppel-like factor 6 (Klf6), mRNA.                                             |
| 6.67E-04 | 7.42E-06 | 2.3 | up | Lyve1     | 114332 | Mus musculus lymphatic vessel endothelial hyaluronan receptor 1 (Lyve1), mRNA.               |
| 0.011512 | 7.58E-04 | 2.2 | up | Npal1     | 70701  | Mus musculus NIPA-like domain containing 1 (Npal1), mRNA.                                    |
| 0.001611 | 3.02E-05 | 2.2 | up | Marco     |        |                                                                                              |
| 0.013467 | 9.89E-04 | 2.2 | up | Bhmt      | 12116  | Mus musculus betaine-homocysteine methyltransferase (Bhmt), mRNA.                            |
| 0.013379 | 9.75E-04 | 2.2 | up | Irs2      | 384783 | Mus musculus insulin receptor substrate 2 (Irs2), mRNA.                                      |
| 2.34E-06 | 8.21E-10 | 2.2 | up | Tnfrsf21  | 94185  | Mus musculus tumor necrosis factor receptor superfamily, member 21 (Tnfrsf21), mRNA.         |
| 0.006154 | 2.84E-04 | 2.2 | up | Cbr1      | 12408  | Mus musculus carbonyl reductase 1 (Cbr1), mRNA.                                              |
| 1.12E-04 | 3.75E-07 | 2.2 | up | Serpina3n | 20716  | Mus musculus serine (or cysteine) peptidase inhibitor, clade A, member 3N (Serpina3n), mRNA. |
| 0.003435 | 1.08E-04 | 2.2 | up | Rapgef4   | 56508  | Mus musculus Rap guanine nucleotide exchange factor (GEF) 4 (Rapgef4), mRNA.                 |
| 8.97E-04 | 1.15E-05 | 2.2 | up | Dnajc12   | 30045  | Mus musculus DnaJ (Hsp40) homolog, subfamily C, member 12 (Dnajc12), mRNA.                   |
| 5.06E-05 | 8.37E-08 | 2.2 | up | Lyz       | 17110  | Mus musculus lysozyme (Lyz), mRNA.                                                           |
| 0.001307 | 2.14E-05 | 2.2 | up | Ela2a     | 13706  | Mus musculus elastase 2A (Ela2a), mRNA.                                                      |
| 0.049716 | 0.007169 | 2.2 | up | Ddit4     | 74747  | Mus musculus DNA-damage-inducible transcript 4 (Ddit4), mRNA.                                |
| 0.029683 | 0.003344 | 2.2 | up | Igk-V5    | 381777 | PREDICTED: Mus musculus immunoglobulin kappa chain variable 5 (V5 family) (Igk-V5), mRNA.    |
| 0.004256 | 1.60E-04 | 2.1 | up | Tmem176a  | 66058  | Mus musculus transmembrane protein 176A (Tmem176a), mRNA.                                    |
| 0.025735 | 0.002714 | 2.1 | up | Camp      | 12796  | Mus musculus cathelicidin antimicrobial peptide (Camp), mRNA.                                |

|          |          |     |    |               |           |                                                                                                           |
|----------|----------|-----|----|---------------|-----------|-----------------------------------------------------------------------------------------------------------|
| 0.003215 | 9.60E-05 | 2.1 | up | Retnlg        | 245195    | Mus musculus resistin like gamma (Retnlg), mRNA.                                                          |
| 0.003601 | 1.19E-04 | 2.1 | up | Tgm2          | 21817     | Mus musculus transglutaminase 2, C polypeptide (Tgm2), mRNA.                                              |
| 0.012886 | 9.18E-04 | 2.1 | up | 2200001115Rik | 69134     | Mus musculus RIKEN cDNA 2200001115 gene (2200001115Rik), mRNA.                                            |
| 0.015292 | 0.001206 | 2.1 | up | Cd63          |           |                                                                                                           |
| 1.58E-04 | 6.60E-07 | 2.1 | up | Esam          | 69524     | Mus musculus endothelial cell-specific adhesion molecule (Esam), mRNA.                                    |
| 1.25E-04 | 4.58E-07 | 2.1 | up | Ier3          | 15937     | Mus musculus immediate early response 3 (Ier3), mRNA.                                                     |
| 0.005162 | 2.14E-04 | 2.1 | up | LOC100046232  | 100046232 | PREDICTED: Mus musculus similar to NFIL3/E4BP4 transcription factor (LOC100046232), mRNA.                 |
| 0.004532 | 1.75E-04 | 2.1 | up | Onecut2       | 225631    | Mus musculus one cut domain, family member 2 (Onecut2), mRNA.                                             |
| 0.001608 | 3.00E-05 | 2.1 | up | Lgals3        | 16854     | Mus musculus lectin, galactose binding, soluble 3 (Lgals3), mRNA.                                         |
| 0.037156 | 0.004655 | 2.1 | up | LOC381774     |           |                                                                                                           |
| 0.001385 | 2.35E-05 | 2.1 | up | Aldoc         | 11676     | Mus musculus aldolase C, fructose-bisphosphate (Aldoc), mRNA.                                             |
| 3.27E-04 | 2.35E-06 | 2.1 | up | Mbl2          | 17195     | Mus musculus mannose-binding lectin (protein C) 2 (Mbl2), mRNA.                                           |
| 0.005779 | 2.55E-04 | 2.1 | up | Por           | 18984     | Mus musculus P450 (cytochrome) oxidoreductase (Por), mRNA.                                                |
| 0.001645 | 3.11E-05 | 2.1 | up | Sgk1          | 20393     | Mus musculus serum/glucocorticoid regulated kinase 1 (Sgk1), mRNA.                                        |
| 0.01858  | 0.001636 | 2.1 | up | Vldlr         | 22359     | Mus musculus very low density lipoprotein receptor (Vldlr), mRNA.                                         |
| 7.70E-04 | 9.15E-06 | 2.1 | up | Gja1          | 14609     | Mus musculus gap junction membrane channel protein alpha 1 (Gja1), mRNA.                                  |
| 1.12E-04 | 3.68E-07 | 2.0 | up | Abcc9         | 20928     | Mus musculus ATP-binding cassette, sub-family C (CFTR/MRP), member 9 (Abcc9), transcript variant 4, mRNA. |
| 0.007421 | 3.93E-04 | 2.0 | up | Nt5e          | 23959     | Mus musculus 5' nucleotidase, ecto (Nt5e), mRNA.                                                          |
| 0.001432 | 2.45E-05 | 2.0 | up | Fkbp5         | 14229     | Mus musculus FK506 binding protein 5 (Fkbp5), mRNA.                                                       |
| 0.009193 | 5.40E-04 | 2.0 | up | Ngp           | 18054     | Mus musculus neutrophilic granule protein (Ngp), mRNA.                                                    |
| 0.019817 | 0.001802 | 2.0 | up | Id1           | 15901     | Mus musculus inhibitor of DNA binding 1 (Id1), mRNA.                                                      |
| 6.58E-05 | 1.25E-07 | 2.0 | up | Dsg1c         |           |                                                                                                           |
| 0.028905 | 0.003233 | 2.0 | up | Vldlr         | 22359     | Mus musculus very low density lipoprotein receptor (Vldlr), mRNA.                                         |
| 0.005544 | 2.39E-04 | 2.0 | up | Por           | 18984     | Mus musculus P450 (cytochrome) oxidoreductase (Por), mRNA.                                                |
| 0.001471 | 2.61E-05 | 2.0 | up | Pik3ap1       | 83490     | Mus musculus phosphoinositide-3-kinase adaptor protein 1 (Pik3ap1), mRNA.                                 |

|          |          |     |    |                    |           |                                                                                               |
|----------|----------|-----|----|--------------------|-----------|-----------------------------------------------------------------------------------------------|
| 3.29E-04 | 2.49E-06 | 2.0 | up | Gpx3               | 14778     | Mus musculus glutathione peroxidase 3 (Gpx3), transcript variant 2, mRNA.                     |
| 7.20E-04 | 8.25E-06 | 2.0 | up | OTTMUSG00000000971 | 100034251 | Mus musculus predicted gene, OTTMUSG00000000971 (OTTMUSG00000000971), mRNA.                   |
| 1.25E-04 | 4.69E-07 | 2.0 | up | Fgf1               | 14164     | Mus musculus fibroblast growth factor 1 (Fgf1), mRNA.                                         |
| 0.042266 | 0.005645 | 2.0 | up | Txnip              | 56338     | Mus musculus thioredoxin interacting protein (Txnip), transcript variant 2, mRNA.             |
| 1.25E-04 | 4.68E-07 | 2.0 | up | Prhoxnb            | 231903    | Mus musculus parahox cluster neighbor (Prhoxnb), mRNA.                                        |
| 2.54E-04 | 1.49E-06 | 2.0 | up | Mmp14              | 17387     | Mus musculus matrix metalloproteinase 14 (membrane-inserted) (Mmp14), mRNA.                   |
| 0.001384 | 2.34E-05 | 2.0 | up | BC048546           | 232400    | Mus musculus cDNA sequence BC048546 (BC048546), mRNA.                                         |
| 8.32E-05 | 1.89E-07 | 2.0 | up | Slc40a1            | 53945     | Mus musculus solute carrier family 40 (iron-regulated transporter), member 1 (Slc40a1), mRNA. |
| 0.001268 | 2.05E-05 | 2.0 | up | Trp53inp1          | 60599     | Mus musculus transformation related protein 53 inducible nuclear protein 1 (Trp53inp1), mRNA. |
| 3.80E-04 | 2.92E-06 | 2.0 | up | Cdkn1a             | 12575     | Mus musculus cyclin-dependent kinase inhibitor 1A (P21) (Cdkn1a), mRNA.                       |
| 6.29E-04 | 6.41E-06 | 2.0 | up | Bsg                | 12215     | Mus musculus basigin (Bsg), transcript variant 1, mRNA.                                       |
| 0.003352 | 1.03E-04 | 2.0 | up | Nudt18             | 213484    | Mus musculus nudix (nucleoside diphosphate linked moiety X)-type motif 18 (Nudt18), mRNA.     |
| 0.010744 | 6.80E-04 | 2.0 | up | Igh-VJ558          |           |                                                                                               |
| 7.12E-05 | 1.39E-07 | 1.9 | up | Cxcl4              | 56744     | Mus musculus chemokine (C-X-C motif) ligand 4 (Cxcl4), mRNA.                                  |
| 1.27E-04 | 5.11E-07 | 1.9 | up | Kcnj8              | 16523     | Mus musculus potassium inwardly-rectifying channel, subfamily J, member 8 (Kcnj8), mRNA.      |
| 6.32E-04 | 6.78E-06 | 1.9 | up | Nrp1               | 18186     | Mus musculus neuropilin 1 (Nrp1), mRNA.                                                       |
| 2.44E-04 | 1.35E-06 | 1.9 | up | Cd93               | 17064     | Mus musculus CD93 antigen (Cd93), mRNA.                                                       |
| 5.22E-04 | 4.95E-06 | 1.9 | up | BC048546           | 232400    | Mus musculus cDNA sequence BC048546 (BC048546), mRNA.                                         |
| 0.002206 | 5.13E-05 | 1.9 | up | Col6a1             | 12833     | Mus musculus procollagen, type VI, alpha 1 (Col6a1), mRNA.                                    |
| 0.00647  | 3.09E-04 | 1.9 | up | 1200016E24Rik      |           |                                                                                               |
| 8.90E-06 | 6.25E-09 | 1.9 | up | Msc                | 17681     | Mus musculus musculin (Msc), mRNA.                                                            |
| 1.20E-04 | 4.14E-07 | 1.9 | up | Prhoxnb            | 231903    | Mus musculus parahox cluster neighbor (Prhoxnb), mRNA.                                        |

|          |          |     |    |               |           |                                                                                                      |
|----------|----------|-----|----|---------------|-----------|------------------------------------------------------------------------------------------------------|
| 0.018621 | 0.001645 | 1.9 | up | Peci          | 23986     | Mus musculus peroxisomal delta3, delta2-enoyl-Coenzyme A isomerase (Peci), mRNA.                     |
| 9.73E-04 | 1.33E-05 | 1.9 | up | Cyp3a13       | 13113     | Mus musculus cytochrome P450, family 3, subfamily a, polypeptide 13 (Cyp3a13), mRNA.                 |
| 2.89E-05 | 3.47E-08 | 1.9 | up | Itih3         | 16426     | Mus musculus inter-alpha trypsin inhibitor, heavy chain 3 (Itih3), mRNA.                             |
| 0.001145 | 1.69E-05 | 1.9 | up | Dnajc12       | 30045     | Mus musculus DnaJ (Hsp40) homolog, subfamily C, member 12 (Dnajc12), mRNA.                           |
| 0.032973 | 0.003915 | 1.9 | up | Slc38a2       | 67760     | Mus musculus solute carrier family 38, member 2 (Slc38a2), mRNA.                                     |
| 0.003884 | 1.38E-04 | 1.9 | up | LOC100044948  | 100044948 | PREDICTED: Mus musculus similar to macrophage migration inhibitory factor (LOC100044948), mRNA.      |
| 0.001582 | 2.89E-05 | 1.9 | up | Rhob          | 11852     | Mus musculus ras homolog gene family, member B (Rhob), mRNA.                                         |
| 0.013467 | 9.89E-04 | 1.9 | up | 9030619P08Rik | 105892    | Mus musculus RIKEN cDNA 9030619P08 gene (9030619P08Rik), mRNA.                                       |
| 0.002206 | 5.14E-05 | 1.9 | up | Rnf186        | 66825     | Mus musculus ring finger protein 186 (Rnf186), mRNA.                                                 |
| 0.012287 | 8.46E-04 | 1.9 | up | C730009D12    |           |                                                                                                      |
| 0.003527 | 1.15E-04 | 1.9 | up | Cyp2c54       | 404195    | Mus musculus cytochrome P450, family 2, subfamily c, polypeptide 54 (Cyp2c54), mRNA.                 |
| 0.002174 | 5.00E-05 | 1.8 | up | Nrp1          | 18186     | Mus musculus neuropilin 1 (Nrp1), mRNA.                                                              |
| 0.012146 | 8.25E-04 | 1.8 | up | S100a6        | 20200     | Mus musculus S100 calcium binding protein A6 (calcyclin) (S100a6), mRNA.                             |
| 7.28E-05 | 1.46E-07 | 1.8 | up | Hp            | 15439     | Mus musculus haptoglobin (Hp), mRNA.                                                                 |
| 3.15E-04 | 2.16E-06 | 1.8 | up | Stat3         | 20848     | Mus musculus signal transducer and activator of transcription 3 (Stat3), transcript variant 1, mRNA. |
| 0.012128 | 8.23E-04 | 1.8 | up | Lrfn3         | 233067    | Mus musculus leucine rich repeat and fibronectin type III domain containing 3 (Lrfn3), mRNA.         |
| 0.003311 | 1.01E-04 | 1.8 | up | Ugcg          | 22234     | Mus musculus UDP-glucose ceramide glucosyltransferase (Ugcg), mRNA.                                  |
| 9.60E-05 | 2.56E-07 | 1.8 | up | B230365C01Rik |           |                                                                                                      |
| 5.82E-04 | 5.77E-06 | 1.8 | up | Apoa5         | 66113     | Mus musculus apolipoprotein A-V (Apoa5), mRNA.                                                       |
| 4.40E-04 | 3.55E-06 | 1.8 | up | LOC100044204  | 100044204 | PREDICTED: Mus musculus hypothetical protein LOC100044204 (LOC100044204), mRNA.                      |
| 0.011512 | 7.58E-04 | 1.8 | up | 2310040A07Rik | 69638     | PREDICTED: Mus musculus RIKEN cDNA 2310040A07 gene (2310040A07Rik), mRNA.                            |



|          |          |     |    |               |        |                                                                                                          |
|----------|----------|-----|----|---------------|--------|----------------------------------------------------------------------------------------------------------|
| 0.006813 | 3.41E-04 | 1.8 | up | Slco1a4       | 28250  | Mus musculus solute carrier organic anion transporter family, member 1a4 (Slco1a4), mRNA.                |
| 4.22E-05 | 6.40E-08 | 1.8 | up | C920030L09Rik |        |                                                                                                          |
| 6.29E-04 | 6.57E-06 | 1.8 | up | 2810410P22Rik |        |                                                                                                          |
| 0.005972 | 2.72E-04 | 1.8 | up | Ugcg          |        |                                                                                                          |
| 1.88E-04 | 8.66E-07 | 1.8 | up | Phlda3        | 27280  | Mus musculus pleckstrin homology-like domain, family A, member 3 (Phlda3), mRNA.                         |
| 0.01789  | 0.001529 | 1.8 | up | Cyp3a11       | 13112  | Mus musculus cytochrome P450, family 3, subfamily a, polypeptide 11 (Cyp3a11), mRNA.                     |
| 9.60E-05 | 2.58E-07 | 1.8 | up | Hp            | 15439  | Mus musculus haptoglobin (Hp), mRNA.                                                                     |
| 0.025201 | 0.002627 | 1.8 | up | Pex11a        | 18631  | Mus musculus peroxisomal biogenesis factor 11a (Pex11a), mRNA.                                           |
| 5.11E-04 | 4.54E-06 | 1.8 | up | Ldha          | 16828  | Mus musculus lactate dehydrogenase A (Ldha), mRNA.                                                       |
| 0.009088 | 5.32E-04 | 1.8 | up | LOC634731     | 634731 | PREDICTED: Mus musculus similar to sushi domain containing 1 (LOC634731), mRNA.                          |
| 0.001222 | 1.93E-05 | 1.8 | up | Avpr1a        | 54140  | Mus musculus arginine vasopressin receptor 1A (Avpr1a), mRNA.                                            |
| 0.001365 | 2.27E-05 | 1.8 | up | Tnfrsf11b     | 18383  | Mus musculus tumor necrosis factor receptor superfamily, member 11b (osteoprotegerin) (Tnfrsf11b), mRNA. |
| 0.025803 | 0.002732 | 1.8 | up | Pex11a        | 18631  | Mus musculus peroxisomal biogenesis factor 11a (Pex11a), mRNA.                                           |
| 0.001469 | 2.59E-05 | 1.8 | up | Colec11       | 71693  | Mus musculus collectin sub-family member 11 (Colec11), mRNA.                                             |
| 8.98E-04 | 1.16E-05 | 1.8 | up | Stat3         | 20848  | Mus musculus signal transducer and activator of transcription 3 (Stat3), transcript variant 1, mRNA.     |
| 0.008697 | 4.96E-04 | 1.8 | up | 4933407C03Rik | 74440  | PREDICTED: Mus musculus RIKEN cDNA 4933407C03 gene, transcript variant 6 (4933407C03Rik), mRNA.          |
| 0.006689 | 3.29E-04 | 1.8 | up | Mfsd7c        | 217721 | Mus musculus major facilitator superfamily domain containing 7C (Mfsd7c), mRNA.                          |
| 0.002835 | 7.70E-05 | 1.8 | up | Col4a1        | 12826  | Mus musculus procollagen, type IV, alpha 1 (Col4a1), mRNA.                                               |
| 0.003636 | 1.22E-04 | 1.7 | up | AW112037      |        |                                                                                                          |
| 0.043972 | 0.005986 | 1.7 | up | Anxa2         | 12306  | Mus musculus annexin A2 (Anxa2), mRNA.                                                                   |
| 0.011841 | 7.95E-04 | 1.7 | up | 1810011O10Rik | 69068  | Mus musculus RIKEN cDNA 1810011O10 gene (1810011O10Rik), mRNA.                                           |
| 4.95E-04 | 4.32E-06 | 1.7 | up | 2810410P22Rik |        |                                                                                                          |

|          |          |     |    |               |        |                                                                                                                       |
|----------|----------|-----|----|---------------|--------|-----------------------------------------------------------------------------------------------------------------------|
| 6.37E-04 | 6.89E-06 | 1.7 | up | Arl5a         | 75423  | Mus musculus ADP-ribosylation factor-like 5A (Arl5a), mRNA.                                                           |
| 0.017255 | 0.001438 | 1.7 | up | Cited2        | 17684  | Mus musculus Cbp/p300-interacting transactivator, with Glu/Asp-rich carboxy-terminal domain, 2 (Cited2), mRNA.        |
| 0.004473 | 1.70E-04 | 1.7 | up | 1810058I24Rik | 67705  | PREDICTED: Mus musculus RIKEN cDNA 1810058I24 gene (1810058I24Rik), misc RNA.                                         |
| 8.22E-05 | 1.77E-07 | 1.7 | up | Zmat3         | 22401  | Mus musculus zinc finger matrin type 3 (Zmat3), mRNA.                                                                 |
| 0.030394 | 0.003449 | 1.7 | up | Gas6          | 14456  | Mus musculus growth arrest specific 6 (Gas6), mRNA.                                                                   |
| 0.002518 | 6.30E-05 | 1.7 | up | Egfl7         | 353156 | Mus musculus EGF-like domain 7 (Egfl7), transcript variant c, mRNA.                                                   |
| 9.58E-04 | 1.28E-05 | 1.7 | up | Mmrn2         | 105450 | Mus musculus multimerin 2 (Mmrn2), mRNA.                                                                              |
| 0.01131  | 7.37E-04 | 1.7 | up | Icam1         | 15894  | Mus musculus intercellular adhesion molecule 1 (Icam1), mRNA.                                                         |
| 2.43E-04 | 1.32E-06 | 1.7 | up | Zfp36l1       | 12192  | Mus musculus zinc finger protein 36, C3H type-like 1 (Zfp36l1), mRNA.                                                 |
| 9.69E-04 | 1.32E-05 | 1.7 | up | 2310061J03Rik |        |                                                                                                                       |
| 0.026409 | 0.00283  | 1.7 | up | Slc17a8       | 216227 | Mus musculus solute carrier family 17 (sodium-dependent inorganic phosphate cotransporter), member 8 (Slc17a8), mRNA. |
| 6.29E-04 | 6.47E-06 | 1.7 | up | Arrdc4        | 66412  | Mus musculus arrestin domain containing 4 (Arrdc4), transcript variant 1, mRNA.                                       |
| 0.015393 | 0.001219 | 1.7 | up | Cd63          | 12512  | Mus musculus CD63 antigen (Cd63), transcript variant 2, mRNA.                                                         |
| 0.003065 | 8.81E-05 | 1.7 | up | Slc11a2       |        |                                                                                                                       |
| 0.025051 | 0.002604 | 1.7 | up | Mgst3         | 66447  | Mus musculus microsomal glutathione S-transferase 3 (Mgst3), mRNA.                                                    |
| 0.004951 | 2.01E-04 | 1.7 | up | Vcam1         | 22329  | Mus musculus vascular cell adhesion molecule 1 (Vcam1), mRNA.                                                         |
| 0.032471 | 0.003826 | 1.7 | up | Gadd45b       | 17873  | Mus musculus growth arrest and DNA-damage-inducible 45 beta (Gadd45b), mRNA.                                          |
| 0.045882 | 0.00638  | 1.7 | up | Pex11a        |        |                                                                                                                       |
| 3.93E-05 | 5.09E-08 | 1.7 | up | Gulo          | 268756 | Mus musculus gulonolactone (L-) oxidase (Gulo), mRNA.                                                                 |
| 9.64E-05 | 2.66E-07 | 1.7 | up | Lrg1          | 76905  | Mus musculus leucine-rich alpha-2-glycoprotein 1 (Lrg1), mRNA.                                                        |
| 4.29E-04 | 3.42E-06 | 1.7 | up | Tmem176b      | 65963  | Mus musculus transmembrane protein 176B (Tmem176b), mRNA.                                                             |
| 0.00739  | 3.90E-04 | 1.7 | up | 4933407C03Rik | 74440  | PREDICTED: Mus musculus RIKEN cDNA 4933407C03 gene, transcript variant 5 (4933407C03Rik), mRNA.                       |
| 0.003102 | 9.09E-05 | 1.7 | up | Sparc         | 20692  | Mus musculus secreted acidic cysteine rich glycoprotein (Sparc), mRNA.                                                |

|          |          |     |    |               |        |                                                                                                                  |
|----------|----------|-----|----|---------------|--------|------------------------------------------------------------------------------------------------------------------|
| 0.00115  | 1.71E-05 | 1.7 | up | Ms4a6d        | 68774  | Mus musculus membrane-spanning 4-domains, subfamily A, member 6D (Ms4a6d), mRNA.                                 |
| 0.002147 | 4.83E-05 | 1.7 | up | Ppap2c        | 50784  | Mus musculus phosphatidic acid phosphatase type 2c (Ppap2c), mRNA.                                               |
| 0.004766 | 1.88E-04 | 1.7 | up | Nfkbia        | 18035  | Mus musculus nuclear factor of kappa light polypeptide gene enhancer in B-cells inhibitor, alpha (Nfkbia), mRNA. |
| 5.61E-04 | 5.45E-06 | 1.7 | up | Ednra         | 13617  | Mus musculus endothelin receptor type A (Ednra), mRNA.                                                           |
| 0.010281 | 6.35E-04 | 1.7 | up | Clpx          |        |                                                                                                                  |
| 0.00684  | 3.46E-04 | 1.7 | up | Fas           | 14102  | Mus musculus Fas (TNF receptor superfamily member 6) (Fas), mRNA.                                                |
| 0.048296 | 0.006895 | 1.7 | up | S100a11       | 20195  | Mus musculus S100 calcium binding protein A11 (calgizzarin) (S100a11), mRNA.                                     |
| 1.07E-04 | 3.09E-07 | 1.7 | up | Cyba          | 13057  | Mus musculus cytochrome b-245, alpha polypeptide (Cyba), mRNA.                                                   |
| 0.017639 | 0.001493 | 1.7 | up | Paqr9         | 75552  | Mus musculus progesterin and adiponectin receptor family member IX (Paqr9), mRNA.                                |
| 0.004015 | 1.46E-04 | 1.7 | up | Tmem86a       | 67893  | Mus musculus transmembrane protein 86A (Tmem86a), mRNA.                                                          |
| 0.011121 | 7.16E-04 | 1.6 | up | Lyzs          | 17105  | Mus musculus lysozyme (Lyzs), mRNA.                                                                              |
| 6.29E-04 | 6.68E-06 | 1.6 | up | Nrn1          | 68404  | Mus musculus neuritin 1 (Nrn1), mRNA.                                                                            |
| 9.58E-04 | 1.28E-05 | 1.6 | up | Dab2          |        |                                                                                                                  |
| 1.71E-06 | 5.13E-10 | 1.6 | up | Pcdh17        | 219228 | Mus musculus protocadherin 17 (Pcdh17), mRNA.                                                                    |
| 0.003311 | 1.00E-04 | 1.6 | up | 1500012F01Rik | 68949  | Mus musculus RIKEN cDNA 1500012F01 gene (1500012F01Rik), mRNA.                                                   |
| 0.00646  | 3.08E-04 | 1.6 | up | Cygb          | 114886 | Mus musculus cytoglobin (Cygb), mRNA.                                                                            |
| 1.60E-04 | 7.06E-07 | 1.6 | up | E130203B14Rik | 320736 | Mus musculus RIKEN cDNA E130203B14 gene (E130203B14Rik), mRNA.                                                   |
| 0.008207 | 4.57E-04 | 1.6 | up | Pbld          | 68371  | Mus musculus phenazine biosynthesis-like protein domain containing (Pbld), mRNA.                                 |
| 0.005413 | 2.29E-04 | 1.6 | up | Ptp4a1        | 19243  | Mus musculus protein tyrosine phosphatase 4a1 (Ptp4a1), mRNA.                                                    |
| 0.036612 | 0.004549 | 1.6 | up | 2310076L09Rik | 66968  | Mus musculus RIKEN cDNA 2310076L09 gene (2310076L09Rik), transcript variant 1, mRNA.                             |
| 1.89E-04 | 8.81E-07 | 1.6 | up | Dab2          | 13132  | Mus musculus disabled homolog 2 (Drosophila) (Dab2), transcript variant 2, mRNA.                                 |
| 0.005425 | 2.31E-04 | 1.6 | up | Ear3          | 53876  | Mus musculus eosinophil-associated, ribonuclease A family, member 3 (Ear3), mRNA.                                |

|          |          |     |    |          |        |                                                                                                        |
|----------|----------|-----|----|----------|--------|--------------------------------------------------------------------------------------------------------|
| 0.003374 | 1.05E-04 | 1.6 | up | Fn1      | 14268  | Mus musculus fibronectin 1 (Fn1), mRNA.                                                                |
| 0.040559 | 0.005302 | 1.6 | up | Sfrs5    | 20384  | Mus musculus splicing factor, arginine/serine-rich 5 (SRp40, HRS) (Sfrs5), transcript variant 2, mRNA. |
| 0.001278 | 2.09E-05 | 1.6 | up | Tgfbi    | 21810  | Mus musculus transforming growth factor, beta induced (Tgfbi), mRNA.                                   |
| 0.00404  | 1.48E-04 | 1.6 | up | Sparc    | 20692  | Mus musculus secreted acidic cysteine rich glycoprotein (Sparc), mRNA.                                 |
| 9.47E-04 | 1.25E-05 | 1.6 | up | Eps8l2   | 98845  | Mus musculus EPS8-like 2 (Eps8l2), mRNA.                                                               |
| 0.001147 | 1.70E-05 | 1.6 | up | Fetub    | 59083  | Mus musculus fetuin beta (Fetub), transcript variant 1, mRNA.                                          |
| 1.58E-04 | 6.75E-07 | 1.6 | up | Bnip3l   | 12177  | Mus musculus BCL2/adenovirus E1B interacting protein 3-like (Bnip3l), mRNA.                            |
| 0.012249 | 8.38E-04 | 1.6 | up | Litaf    | 56722  | Mus musculus LPS-induced TN factor (Litaf), mRNA.                                                      |
| 0.001931 | 4.10E-05 | 1.6 | up | Abca8b   | 27404  | Mus musculus ATP-binding cassette, sub-family A (ABC1), member 8b (Abca8b), mRNA.                      |
| 0.001885 | 3.87E-05 | 1.6 | up | Pcp4l1   | 66425  | PREDICTED: Mus musculus Purkinje cell protein 4-like 1 (Pcp4l1), mRNA.                                 |
| 0.013025 | 9.36E-04 | 1.6 | up | Lgmn     | 19141  | Mus musculus legumain (Lgmn), mRNA.                                                                    |
| 0.003901 | 1.40E-04 | 1.6 | up | S3-12    | 57435  | Mus musculus plasma membrane associated protein, S3-12 (S3-12), mRNA.                                  |
| 0.026358 | 0.002816 | 1.6 | up | EG240549 | 240549 | Mus musculus predicted gene, EG240549 (EG240549), mRNA.                                                |
| 0.037676 | 0.004762 | 1.6 | up | Paqr9    | 75552  | Mus musculus progesterin and adipoQ receptor family member IX (Paqr9), mRNA.                           |
| 0.011334 | 7.39E-04 | 1.6 | up | Ung      | 22256  | Mus musculus uracil DNA glycosylase (Ung), transcript variant 2, mRNA.                                 |
| 0.002704 | 7.11E-05 | 1.6 | up | Abhd2    | 54608  | Mus musculus abhydrolase domain containing 2 (Abhd2), mRNA.                                            |
| 4.29E-04 | 3.44E-06 | 1.6 | up | Stat3    | 20848  | Mus musculus signal transducer and activator of transcription 3 (Stat3), transcript variant 3, mRNA.   |
| 9.60E-04 | 1.29E-05 | 1.6 | up | Csrp3    | 13009  | Mus musculus cysteine and glycine-rich protein 3 (Csrp3), mRNA.                                        |
| 2.94E-04 | 1.90E-06 | 1.6 | up | BC025446 | 223631 | Mus musculus cDNA sequence BC025446 (BC025446), mRNA.                                                  |
| 0.00885  | 5.07E-04 | 1.6 | up | Parp16   | 214424 | Mus musculus poly (ADP-ribose) polymerase family, member 16 (Parp16), mRNA.                            |
| 0.015908 | 0.001276 | 1.6 | up | B3galt1  | 26877  | Mus musculus UDP-Gal:betaGlcNAc beta 1,3-galactosyltransferase, polypeptide 1 (B3galt1), mRNA.         |
| 0.003901 | 1.40E-04 | 1.6 | up | Flt1     | 14254  | Mus musculus FMS-like tyrosine kinase 1 (Flt1), mRNA.                                                  |
| 0.003311 | 1.01E-04 | 1.6 | up | Robo1    | 19876  | Mus musculus roundabout homolog 1 (Drosophila) (Robo1), mRNA.                                          |

|          |          |     |    |               |        |                                                                                                                   |
|----------|----------|-----|----|---------------|--------|-------------------------------------------------------------------------------------------------------------------|
| 0.008636 | 4.90E-04 | 1.6 | up | Pla2g12a      | 66350  | Mus musculus phospholipase A2, group XIIA (Pla2g12a), transcript variant 1, mRNA.                                 |
| 0.005164 | 2.15E-04 | 1.6 | up | Ppic          | 19038  | Mus musculus peptidylprolyl isomerase C (Ppic), mRNA.                                                             |
| 2.68E-04 | 1.63E-06 | 1.6 | up | Kng2          | 385643 | Mus musculus kininogen 2 (Kng2), mRNA.                                                                            |
| 4.95E-04 | 4.30E-06 | 1.6 | up | Sod3          | 20657  | Mus musculus superoxide dismutase 3, extracellular (Sod3), mRNA.                                                  |
| 0.009929 | 6.02E-04 | 1.6 | up | Nr1i3         | 12355  | Mus musculus nuclear receptor subfamily 1, group I, member 3 (Nr1i3), mRNA.                                       |
| 0.026414 | 0.002832 | 1.6 | up | 2310040A07Rik | 69638  | PREDICTED: Mus musculus RIKEN cDNA 2310040A07 gene (2310040A07Rik), mRNA.                                         |
| 0.00616  | 2.85E-04 | 1.6 | up | Abca8         |        |                                                                                                                   |
| 0.004473 | 1.71E-04 | 1.6 | up | Prkcbp1       | 228880 | Mus musculus protein kinase C binding protein 1 (Prkcbp1), mRNA.                                                  |
| 0.001206 | 1.87E-05 | 1.6 | up | Apobec1       | 11810  | Mus musculus apolipoprotein B mRNA editing enzyme, catalytic polypeptide 1 (Apobec1), transcript variant 1, mRNA. |
| 0.006527 | 3.17E-04 | 1.6 | up | Trp53inp1     | 60599  | Mus musculus transformation related protein 53 inducible nuclear protein 1 (Trp53inp1), mRNA.                     |
| 0.002094 | 4.67E-05 | 1.6 | up | Sult1a1       | 20887  | Mus musculus sulfotransferase family 1A, phenol-preferring, member 1 (Sult1a1), mRNA.                             |
| 0.007288 | 3.81E-04 | 1.6 | up | Tagln2        | 21346  | Mus musculus transgelin 2 (Tagln2), mRNA.                                                                         |
| 0.036199 | 0.00447  | 1.6 | up | Anxa5         | 11747  | Mus musculus annexin A5 (Anxa5), mRNA.                                                                            |
| 0.003866 | 1.37E-04 | 1.6 | up | Anxa3         | 11745  | Mus musculus annexin A3 (Anxa3), mRNA.                                                                            |
| 0.001529 | 2.77E-05 | 1.6 | up | Tes           | 21753  | Mus musculus testis derived transcript (Tes), transcript variant 1, mRNA.                                         |
| 4.80E-04 | 4.09E-06 | 1.6 | up | Icam2         | 15896  | Mus musculus intercellular adhesion molecule 2 (Icam2), mRNA.                                                     |
| 0.011891 | 8.01E-04 | 1.6 | up | C1qc          | 12262  | Mus musculus complement component 1, q subcomponent, C chain (C1qc), mRNA.                                        |
| 4.22E-05 | 6.53E-08 | 1.6 | up | Bax           | 12028  | Mus musculus Bcl2-associated X protein (Bax), mRNA.                                                               |
| 0.010554 | 6.62E-04 | 1.6 | up | Nrbp2         | 223649 | Mus musculus nuclear receptor binding protein 2 (Nrbp2), mRNA.                                                    |
| 0.004473 | 1.71E-04 | 1.6 | up | Ptp4a2        | 19244  | Mus musculus protein tyrosine phosphatase 4a2 (Ptp4a2), mRNA.                                                     |
| 0.022049 | 0.002137 | 1.6 | up | 2810402K13Rik |        |                                                                                                                   |
| 4.77E-04 | 4.02E-06 | 1.6 | up | Ttpa          | 50500  | Mus musculus tocopherol (alpha) transfer protein (Ttpa), mRNA.                                                    |
| 0.003216 | 9.64E-05 | 1.6 | up | Vwf           | 22371  | Mus musculus Von Willebrand factor homolog (Vwf), mRNA.                                                           |

|          |          |     |    |                 |        |                                                                                           |
|----------|----------|-----|----|-----------------|--------|-------------------------------------------------------------------------------------------|
| 2.21E-04 | 1.14E-06 | 1.6 | up | Mustn1          | 66175  | Mus musculus musculoskeletal, embryonic nuclear protein 1 (Mustn1), mRNA.                 |
| 0.005162 | 2.14E-04 | 1.6 | up | Tbx3            | 21386  | Mus musculus T-box 3 (Tbx3), transcript variant 1, mRNA.                                  |
| 0.003503 | 1.13E-04 | 1.6 | up | scl0001379.1_70 |        |                                                                                           |
| 8.88E-04 | 1.14E-05 | 1.6 | up | Prlr            | 19116  | Mus musculus prolactin receptor (Prlr), mRNA.                                             |
| 7.75E-04 | 9.28E-06 | 1.6 | up | Hp              | 15439  | Mus musculus haptoglobin (Hp), mRNA.                                                      |
| 0.044241 | 0.006033 | 1.6 | up | Arl4a           | 11861  | Mus musculus ADP-ribosylation factor-like 4A (Arl4a), transcript variant 1, mRNA.         |
| 0.008156 | 4.52E-04 | 1.6 | up | Ptp4a2          | 19244  | Mus musculus protein tyrosine phosphatase 4a2 (Ptp4a2), mRNA.                             |
| 2.54E-04 | 1.48E-06 | 1.6 | up | Itih3           |        |                                                                                           |
| 0.010441 | 6.50E-04 | 1.6 | up | 2810026P18Rik   |        |                                                                                           |
| 0.004971 | 2.02E-04 | 1.6 | up | Elt1            | 170757 | Mus musculus EGF, latrophilin seven transmembrane domain containing 1 (Elt1), mRNA.       |
| 0.003861 | 1.37E-04 | 1.6 | up | Itih4           | 16427  | Mus musculus inter alpha-trypsin inhibitor, heavy chain 4 (Itih4), mRNA.                  |
| 0.034179 | 0.004125 | 1.6 | up | Slc35c1         | 228368 | Mus musculus solute carrier family 35, member C1 (Slc35c1), transcript variant 2, mRNA.   |
| 0.003061 | 8.68E-05 | 1.6 | up | Plac8           | 231507 | Mus musculus placenta-specific 8 (Plac8), mRNA.                                           |
| 0.01556  | 0.001238 | 1.6 | up | Arhgef3         | 71704  | Mus musculus Rho guanine nucleotide exchange factor (GEF) 3 (Arhgef3), mRNA.              |
| 0.010035 | 6.14E-04 | 1.6 | up | Lum             | 17022  | Mus musculus lumican (Lum), mRNA.                                                         |
| 0.001523 | 2.73E-05 | 1.6 | up | Fos             | 14281  | Mus musculus FBJ osteosarcoma oncogene (Fos), mRNA.                                       |
| 0.006792 | 3.38E-04 | 1.6 | up | Map3k1          | 26401  | Mus musculus mitogen-activated protein kinase kinase kinase 1 (Map3k1), mRNA.             |
| 3.19E-04 | 2.23E-06 | 1.5 | up | Vim             | 22352  | Mus musculus vimentin (Vim), mRNA.                                                        |
| 0.001028 | 1.44E-05 | 1.5 | up | Agt             | 11606  | Mus musculus angiotensinogen (serpin peptidase inhibitor, clade A, member 8) (Agt), mRNA. |
| 0.001599 | 2.97E-05 | 1.5 | up | Abcd2           | 26874  | Mus musculus ATP-binding cassette, sub-family D (ALD), member 2 (Abcd2), mRNA.            |
| 0.003803 | 1.32E-04 | 1.5 | up | Csrp3           | 13009  | Mus musculus cysteine and glycine-rich protein 3 (Csrp3), mRNA.                           |
| 0.003527 | 1.15E-04 | 1.5 | up | Grn             | 14824  | Mus musculus granulin (Grn), mRNA.                                                        |

|          |          |     |    |               |           |                                                                                                                                               |
|----------|----------|-----|----|---------------|-----------|-----------------------------------------------------------------------------------------------------------------------------------------------|
| 0.003479 | 1.10E-04 | 1.5 | up | Tes           | 21753     | Mus musculus testis derived transcript (Tes), transcript variant 1, mRNA.                                                                     |
| 4.66E-04 | 3.88E-06 | 1.5 | up | LOC100046883  | 100046883 | PREDICTED: Mus musculus similar to CKLF-like MARVEL transmembrane domain containing 3 (LOC100046883), mRNA.                                   |
| 0.001165 | 1.76E-05 | 1.5 | up | Ppap2c        | 50784     | Mus musculus phosphatidic acid phosphatase type 2c (Ppap2c), mRNA.                                                                            |
| 0.007871 | 4.30E-04 | 1.5 | up | Ang           | 11727     | Mus musculus angiogenin, ribonuclease, RNase A family, 5 (Ang), mRNA.                                                                         |
| 0.006813 | 3.43E-04 | 1.5 | up | Zfp36l1       | 12192     | Mus musculus zinc finger protein 36, C3H type-like 1 (Zfp36l1), mRNA.                                                                         |
| 0.027534 | 0.003003 | 1.5 | up | 382044        | 382044    | Mus musculus predicted gene, 382044 (382044), mRNA.                                                                                           |
| 0.014197 | 0.001079 | 1.5 | up | Chi3l3        |           |                                                                                                                                               |
| 0.020106 | 0.001844 | 1.5 | up | Col4a2        | 12827     | Mus musculus collagen, type IV, alpha 2 (Col4a2), mRNA.                                                                                       |
| 2.25E-05 | 2.25E-08 | 1.5 | up | Ramp1         | 51801     | Mus musculus receptor (calcitonin) activity modifying protein 1 (Ramp1), mRNA.                                                                |
| 0.013437 | 9.83E-04 | 1.5 | up | Ppp2r2d       | 52432     | Mus musculus protein phosphatase 2, regulatory subunit B, delta isoform (Ppp2r2d), mRNA.                                                      |
| 0.012709 | 9.01E-04 | 1.5 | up | Dusp6         | 67603     | Mus musculus dual specificity phosphatase 6 (Dusp6), mRNA.                                                                                    |
| 8.88E-04 | 1.13E-05 | 1.5 | up | Serpina11     | 380780    | PREDICTED: Mus musculus serine (or cysteine) peptidase inhibitor, clade A (alpha-1 antiproteinase, antitrypsin), member 11 (Serpina11), mRNA. |
| 7.55E-04 | 8.81E-06 | 1.5 | up | Lcat          | 16816     | Mus musculus lecithin cholesterol acyltransferase (Lcat), mRNA.                                                                               |
| 0.00183  | 3.63E-05 | 1.5 | up | Ccng1         | 12450     | Mus musculus cyclin G1 (Ccng1), mRNA.                                                                                                         |
| 0.013707 | 0.001017 | 1.5 | up | 1190002N15Rik |           |                                                                                                                                               |
| 0.011988 | 8.10E-04 | 1.5 | up | Slc25a33      | 70556     | Mus musculus solute carrier family 25, member 33 (Slc25a33), mRNA.                                                                            |
| 0.006692 | 3.30E-04 | 1.5 | up | 1190002N15Rik | 68861     | Mus musculus RIKEN cDNA 1190002N15 gene (1190002N15Rik), mRNA.                                                                                |
| 0.019817 | 0.001801 | 1.5 | up | Arl4a         | 11861     | Mus musculus ADP-ribosylation factor-like 4A (Arl4a), transcript variant 1, mRNA.                                                             |
| 0.01896  | 0.001684 | 1.5 | up | Olfir707      | 194433    | Mus musculus olfactory receptor 707 (Olfir707), mRNA.                                                                                         |
| 3.04E-04 | 2.04E-06 | 1.5 | up | Nicn1         | 66257     | Mus musculus nicolin 1 (Nicn1), mRNA.                                                                                                         |
| 0.005201 | 2.17E-04 | 1.5 | up | C4b           | 12268     | Mus musculus complement component 4B (Childo blood group) (C4b), mRNA. XM_921663 XM_921673 XM_921676 XM_921678                                |
| 0.005818 | 2.60E-04 | 1.5 | up | Gucy1a3       | 60596     | Mus musculus guanylate cyclase 1, soluble, alpha 3 (Gucy1a3), mRNA.                                                                           |
| 0.003065 | 8.81E-05 | 1.5 | up | Ccng1         | 12450     | Mus musculus cyclin G1 (Ccng1), mRNA.                                                                                                         |

|          |          |     |      |               |           |                                                                                                                     |
|----------|----------|-----|------|---------------|-----------|---------------------------------------------------------------------------------------------------------------------|
| 0.004904 | 1.98E-04 | 1.5 | up   | Ear2          | 13587     | Mus musculus eosinophil-associated, ribonuclease A family, member 2 (Ear2), mRNA.                                   |
| 0.004157 | 1.54E-04 | 1.5 | up   | Avpr1a        | 54140     | Mus musculus arginine vasopressin receptor 1A (Avpr1a), mRNA.                                                       |
| 0.004165 | 1.55E-04 | 1.5 | up   | Lcat          | 16816     | Mus musculus lecithin cholesterol acyltransferase (Lcat), mRNA.                                                     |
| 0.00944  | 5.63E-04 | 1.5 | up   | Slc41a2       | 338365    | Mus musculus solute carrier family 41, member 2 (Slc41a2), mRNA.                                                    |
| 4.48E-04 | 3.68E-06 | 1.5 | up   | Armcx2        | 67416     | Mus musculus armadillo repeat containing, X-linked 2 (Armcx2), mRNA.                                                |
| 0.035187 | 0.004298 | 1.5 | up   | Igl-V1        |           |                                                                                                                     |
| 0.00474  | 1.86E-04 | 1.5 | up   | Raet1b        | 19369     | Mus musculus retinoic acid early transcript beta (Raet1b), mRNA.                                                    |
| 0.003446 | 1.08E-04 | 1.5 | up   | Ilvbl         | 216136    | Mus musculus ilvB (bacterial acetolactate synthase)-like (Ilvbl), mRNA.                                             |
| 0.003843 | 1.36E-04 | 1.5 | up   | LOC100045680  | 100045680 | PREDICTED: Mus musculus similar to complement C4 (LOC100045680), mRNA.                                              |
| 0.023903 | 0.002421 | 1.5 | up   | A630082K20Rik |           |                                                                                                                     |
| 0.003381 | 1.05E-04 | 1.5 | up   | Raet1b        | 19369     | Mus musculus retinoic acid early transcript beta (Raet1b), mRNA.                                                    |
| 2.54E-04 | 1.47E-06 | 1.5 | up   | Pros1         | 19128     | Mus musculus protein S (alpha) (Pros1), mRNA.                                                                       |
| 0.006189 | 2.89E-04 | 1.5 | up   | Cd93          | 17064     | Mus musculus CD93 antigen (Cd93), mRNA.                                                                             |
| 9.80E-04 | 1.35E-05 | 1.5 | up   | Sema3f        | 20350     | Mus musculus sema domain, immunoglobulin domain (Ig), short basic domain, secreted, (semaphorin) 3F (Sema3f), mRNA. |
| 0.001169 | 1.78E-05 | 8.3 | down | Cyp4a12b      | 13118     | Mus musculus cytochrome P450, family 4, subfamily a, polypeptide 12B (Cyp4a12b), mRNA.                              |
| 0.009669 | 5.81E-04 | 7.7 | down | Elov3         |           |                                                                                                                     |
| 5.21E-04 | 4.80E-06 | 6.4 | down | Thrsp         | 21835     | Mus musculus thyroid hormone responsive SPOT14 homolog (Rattus) (Thrsp), mRNA.                                      |
| 0.00368  | 1.25E-04 | 5.7 | down | LOC236060     |           |                                                                                                                     |
| 6.29E-04 | 6.63E-06 | 4.9 | down | LOC100044164  | 100044164 | PREDICTED: Mus musculus hypothetical protein LOC100044164 (LOC100044164), mRNA.                                     |
| 0.00813  | 4.50E-04 | 4.5 | down | Cyp4a12a      | 277753    | Mus musculus cytochrome P450, family 4, subfamily a, polypeptide 12a (Cyp4a12a), mRNA.                              |
| 9.61E-04 | 1.29E-05 | 4.5 | down | Cyp2a5        | 13087     | Mus musculus cytochrome P450, family 2, subfamily a, polypeptide 5 (Cyp2a5), mRNA.                                  |
| 6.16E-05 | 1.09E-07 | 4.5 | down | EG241041      | 241041    | Mus musculus predicted gene, EG241041 (EG241041), non-coding RNA.                                                   |



|          |          |     |      |                    |        |                                                                                                                        |
|----------|----------|-----|------|--------------------|--------|------------------------------------------------------------------------------------------------------------------------|
| 0.003859 | 1.37E-04 | 4.4 | down | Elov13             | 12686  | Mus musculus elongation of very long chain fatty acids (FEN1/Elo2, SUR4/Elo3, yeast)-like 3 (Elov13), mRNA.            |
| 3.29E-04 | 2.45E-06 | 4.2 | down | EG241041           | 241041 | Mus musculus predicted gene, EG241041 (EG241041), non-coding RNA.                                                      |
| 3.00E-04 | 2.00E-06 | 3.9 | down | Cyp2a5             | 13087  | Mus musculus cytochrome P450, family 2, subfamily a, polypeptide 5 (Cyp2a5), mRNA.                                     |
| 0.002592 | 6.64E-05 | 3.8 | down | Mup4               | 17843  | Mus musculus major urinary protein 4 (Mup4), mRNA.                                                                     |
| 2.96E-04 | 1.95E-06 | 3.7 | down | Elov16             | 170439 | Mus musculus ELOVL family member 6, elongation of long chain fatty acids (yeast) (Elov16), mRNA.                       |
| 0.018573 | 0.001634 | 3.5 | down | OTTMUSG00000007485 | 381530 | Mus musculus predicted gene, OTTMUSG00000007485 (OTTMUSG00000007485), mRNA.                                            |
| 0.002696 | 7.08E-05 | 3.4 | down | Serpina4-ps1       | 321018 | Mus musculus serine (or cysteine) peptidase inhibitor, clade A, member 4, pseudogene 1 (Serpina4-ps1), non-coding RNA. |
| 3.27E-04 | 2.38E-06 | 3.4 | down | Hes6               | 55927  | Mus musculus hairy and enhancer of split 6 (Drosophila) (Hes6), mRNA.                                                  |
| 1.58E-04 | 6.72E-07 | 3.3 | down | Aacs               | 78894  | Mus musculus acetoacetyl-CoA synthetase (Aacs), mRNA.                                                                  |
| 1.25E-04 | 4.82E-07 | 3.3 | down | LOC677317          | 677317 | PREDICTED: Mus musculus similar to Mod1 protein, transcript variant 4 (LOC677317), mRNA.                               |
| 0.003065 | 8.86E-05 | 3.3 | down | Cyp2a5             | 13087  | Mus musculus cytochrome P450, family 2, subfamily a, polypeptide 5 (Cyp2a5), mRNA.                                     |
| 0.00368  | 1.26E-04 | 3.3 | down | Nudt7              |        |                                                                                                                        |
| 2.10E-04 | 1.05E-06 | 3.1 | down | Acly               | 104112 | Mus musculus ATP citrate lyase (Acly), mRNA.                                                                           |
| 0.004647 | 1.81E-04 | 3.1 | down | Igh-6              |        |                                                                                                                        |
| 0.002564 | 6.49E-05 | 3.0 | down | Hes6               | 55927  | Mus musculus hairy and enhancer of split 6 (Drosophila) (Hes6), mRNA.                                                  |
| 1.09E-04 | 3.22E-07 | 3.0 | down | Mod1               | 17436  | Mus musculus malic enzyme, supernatant (Mod1), mRNA.                                                                   |
| 0.001268 | 2.05E-05 | 3.0 | down | Hes6               | 55927  | Mus musculus hairy and enhancer of split 6 (Drosophila) (Hes6), mRNA.                                                  |
| 0.001382 | 2.32E-05 | 2.9 | down | LOC384022          |        |                                                                                                                        |
| 7.44E-06 | 4.47E-09 | 2.9 | down | Olig1              | 50914  | Mus musculus oligodendrocyte transcription factor 1 (Olig1), mRNA.                                                     |
| 5.21E-04 | 4.79E-06 | 2.8 | down | Acss2              | 60525  | Mus musculus acyl-CoA synthetase short-chain family member 2 (Acss2), mRNA.                                            |
| 0.006821 | 3.45E-04 | 2.8 | down | Igh-6              |        |                                                                                                                        |

|          |          |     |      |                    |           |                                                                                                               |
|----------|----------|-----|------|--------------------|-----------|---------------------------------------------------------------------------------------------------------------|
| 6.29E-04 | 6.46E-06 | 2.8 | down | Acacb              |           |                                                                                                               |
| 0.003063 | 8.73E-05 | 2.7 | down | Sucnr1             | 84112     | Mus musculus succinate receptor 1 (Sucnr1), mRNA.                                                             |
| 3.93E-05 | 5.14E-08 | 2.7 | down | Klk1b4             | 18048     | Mus musculus kallikrein 1-related peptidase b4 (Klk1b4), mRNA.                                                |
| 6.94E-04 | 7.90E-06 | 2.7 | down | Mvd                | 192156    | Mus musculus mevalonate (diphospho) decarboxylase (Mvd), mRNA.                                                |
| 5.22E-04 | 4.84E-06 | 2.7 | down | Pnpla5             |           |                                                                                                               |
| 6.39E-04 | 6.99E-06 | 2.6 | down | Nudt7              | 67528     | Mus musculus nudix (nucleoside diphosphate linked moiety X)-type motif 7 (Nudt7), transcript variant 2, mRNA. |
| 0.00183  | 3.63E-05 | 2.6 | down | Fkbp11             | 66120     | Mus musculus FK506 binding protein 11 (Fkbp11), mRNA.                                                         |
| 0.001971 | 4.25E-05 | 2.5 | down | Srd5a1             |           |                                                                                                               |
| 8.28E-04 | 1.01E-05 | 2.5 | down | LOC100043671       | 100043671 | PREDICTED: Mus musculus hypothetical protein LOC100043671 (LOC100043671), mRNA.                               |
| 1.07E-04 | 3.12E-07 | 2.5 | down | Klk1b4             | 18048     | Mus musculus kallikrein 1-related peptidase b4 (Klk1b4), mRNA.                                                |
| 0.003745 | 1.29E-04 | 2.5 | down | Rdh16              | 19683     | Mus musculus retinol dehydrogenase 16 (Rdh16), mRNA.                                                          |
| 0.003311 | 1.00E-04 | 2.5 | down | Nudt7              | 67528     | Mus musculus nudix (nucleoside diphosphate linked moiety X)-type motif 7 (Nudt7), transcript variant 1, mRNA. |
| 0.00253  | 6.35E-05 | 2.5 | down | 2810439F02Rik      | 72747     | Mus musculus RIKEN cDNA 2810439F02 gene (2810439F02Rik), mRNA.                                                |
| 0.00714  | 3.69E-04 | 2.4 | down | Chrna4             | 11438     | Mus musculus cholinergic receptor, nicotinic, alpha polypeptide 4 (Chrna4), mRNA.                             |
| 4.12E-04 | 3.22E-06 | 2.4 | down | Hsp105             |           |                                                                                                               |
| 0.00215  | 4.87E-05 | 2.4 | down | Rdh11              |           |                                                                                                               |
| 0.044314 | 0.006048 | 2.4 | down | OTTMUSG00000000231 | 381531    | Mus musculus predicted gene, OTTMUSG00000000231 (OTTMUSG00000000231), mRNA.                                   |
| 0.007115 | 3.66E-04 | 2.4 | down | EG13909            | 13909     | Mus musculus predicted gene, EG13909 (EG13909), mRNA.                                                         |
| 0.001165 | 1.77E-05 | 2.3 | down | Pklr               | 18770     | Mus musculus pyruvate kinase liver and red blood cell (Pklr), mRNA.                                           |
| 4.80E-04 | 4.07E-06 | 2.3 | down | Fasn               | 14104     | Mus musculus fatty acid synthase (Fasn), mRNA.                                                                |
| 0.001145 | 1.69E-05 | 2.3 | down | Gstp1              | 14870     | Mus musculus glutathione S-transferase, pi 1 (Gstp1), mRNA.                                                   |
| 0.004765 | 1.88E-04 | 2.3 | down | Pnpla3             | 116939    | Mus musculus patatin-like phospholipase domain containing 3 (Pnpla3), mRNA.                                   |
| 0.007169 | 3.72E-04 | 2.3 | down | Hamp2              | 66438     | Mus musculus hepcidin antimicrobial peptide 2 (Hamp2), mRNA.                                                  |

|          |          |     |      |               |           |                                                                                                       |
|----------|----------|-----|------|---------------|-----------|-------------------------------------------------------------------------------------------------------|
| 0.00215  | 4.87E-05 | 2.3 | down | Ntrk2         | 18212     | Mus musculus neurotrophic tyrosine kinase, receptor, type 2 (Ntrk2), transcript variant 1, mRNA.      |
| 0.009228 | 5.44E-04 | 2.3 | down | LOC245892     |           |                                                                                                       |
| 0.003043 | 8.54E-05 | 2.3 | down | H2-Ab1        | 14961     | Mus musculus histocompatibility 2, class II antigen A, beta 1 (H2-Ab1), mRNA.                         |
| 0.006522 | 3.14E-04 | 2.3 | down | 2810439F02Rik | 72747     | Mus musculus RIKEN cDNA 2810439F02 gene (2810439F02Rik), mRNA.                                        |
| 1.60E-04 | 7.08E-07 | 2.2 | down | Sgk2          | 27219     | Mus musculus serum/glucocorticoid regulated kinase 2 (Sgk2), mRNA.                                    |
| 0.003124 | 9.25E-05 | 2.2 | down | Rdh11         | 17252     | Mus musculus retinol dehydrogenase 11 (Rdh11), mRNA.                                                  |
| 0.00279  | 7.50E-05 | 2.2 | down | G6pdx         | 14381     | Mus musculus glucose-6-phosphate dehydrogenase X-linked (G6pdx), mRNA.                                |
| 0.01229  | 8.47E-04 | 2.2 | down | LOC666559     | 666559    | PREDICTED: Mus musculus similar to farnesyl pyrophosphate synthase (LOC666559), misc RNA.             |
| 0.0035   | 1.12E-04 | 2.2 | down | Fdps          | 110196    | Mus musculus farnesyl diphosphate synthetase (Fdps), mRNA.                                            |
| 0.005425 | 2.31E-04 | 2.2 | down | Aqp8          | 11833     | Mus musculus aquaporin 8 (Aqp8), mRNA.                                                                |
| 4.94E-04 | 4.23E-06 | 2.2 | down | Sgk2          | 27219     | Mus musculus serum/glucocorticoid regulated kinase 2 (Sgk2), mRNA.                                    |
| 0.01342  | 9.80E-04 | 2.2 | down | Chrna4        | 11438     | Mus musculus cholinergic receptor, nicotinic, alpha polypeptide 4 (Chrna4), mRNA.                     |
| 0.004075 | 1.50E-04 | 2.2 | down | LOC641240     | 641240    | PREDICTED: Mus musculus similar to MHC class II antigen beta chain (LOC641240), mRNA.                 |
| 0.001396 | 2.39E-05 | 2.2 | down | Cyp2d40       | 71754     | Mus musculus cytochrome P450, family 2, subfamily d, polypeptide 40 (Cyp2d40), mRNA.                  |
| 0.001891 | 3.97E-05 | 2.2 | down | 1500017E21Rik |           |                                                                                                       |
| 0.020719 | 0.001929 | 2.1 | down | Cxcl9         | 17329     | Mus musculus chemokine (C-X-C motif) ligand 9 (Cxcl9), mRNA.                                          |
| 0.010993 | 7.03E-04 | 2.1 | down | Mid1ip1       | 68041     | Mus musculus Mid1 interacting protein 1 (gastrulation specific G12-like (zebrafish)) (Mid1ip1), mRNA. |
| 0.004507 | 1.73E-04 | 2.1 | down | Bdh2          | 69772     | Mus musculus 3-hydroxybutyrate dehydrogenase, type 2 (Bdh2), mRNA.                                    |
| 0.001204 | 1.87E-05 | 2.1 | down | LOC100046163  | 100046163 | PREDICTED: Mus musculus similar to Nme6 protein (LOC100046163), mRNA.                                 |
| 0.001599 | 2.95E-05 | 2.1 | down | H2-Eb1        | 14969     | Mus musculus histocompatibility 2, class II antigen E beta (H2-Eb1), mRNA.                            |
| 0.003479 | 1.11E-04 | 2.1 | down | Gstp1         | 14870     | Mus musculus glutathione S-transferase, pi 1 (Gstp1), mRNA.                                           |

|          |          |     |      |               |           |                                                                                                                                               |
|----------|----------|-----|------|---------------|-----------|-----------------------------------------------------------------------------------------------------------------------------------------------|
| 0.002167 | 4.96E-05 | 2.1 | down | Ddah1         |           |                                                                                                                                               |
| 1.25E-04 | 4.88E-07 | 2.1 | down | Reck          |           |                                                                                                                                               |
| 0.01145  | 7.49E-04 | 2.1 | down | Acpp          | 56318     | Mus musculus acid phosphatase, prostate (Acpp), transcript variant 1, mRNA.                                                                   |
| 0.002258 | 5.33E-05 | 2.1 | down | Tlcd2         | 380712    | Mus musculus TLC domain containing 2 (Tlcd2), mRNA.                                                                                           |
| 0.001834 | 3.66E-05 | 2.1 | down | Gna14         | 14675     | Mus musculus guanine nucleotide binding protein, alpha 14 (Gna14), mRNA.                                                                      |
| 0.005649 | 2.47E-04 | 2.0 | down | Aqp8          | 11833     | Mus musculus aquaporin 8 (Aqp8), mRNA.                                                                                                        |
| 0.012539 | 8.84E-04 | 2.0 | down | Gpam          | 14732     | Mus musculus glycerol-3-phosphate acyltransferase, mitochondrial (Gpam), nuclear gene encoding mitochondrial protein, mRNA.                   |
| 0.001499 | 2.67E-05 | 2.0 | down | Igfbp2        | 16008     | Mus musculus insulin-like growth factor binding protein 2 (Igfbp2), mRNA.                                                                     |
| 0.001214 | 1.91E-05 | 2.0 | down | Gstp1         | 14870     | Mus musculus glutathione S-transferase, pi 1 (Gstp1), mRNA.                                                                                   |
| 2.68E-04 | 1.63E-06 | 2.0 | down | LOC100044756  | 100044756 | PREDICTED: Mus musculus similar to PX domain-containing protein kinase-like protein (Modulator of Na,K-ATPase) (MONaKA) (LOC100044756), mRNA. |
| 0.020611 | 0.001914 | 2.0 | down | Car3          | 12350     | Mus musculus carbonic anhydrase 3 (Car3), mRNA.                                                                                               |
| 0.002151 | 4.90E-05 | 2.0 | down | Pklr          | 18770     | Mus musculus pyruvate kinase liver and red blood cell (Pklr), mRNA.                                                                           |
| 1.94E-05 | 1.82E-08 | 2.0 | down | Xkr9          | 381246    | Mus musculus X Kell blood group precursor related family member 9 homolog (Xkr9), mRNA.                                                       |
| 0.015292 | 0.001203 | 2.0 | down | Alas2         |           |                                                                                                                                               |
| 0.008697 | 4.96E-04 | 2.0 | down | Per2          | 18627     | Mus musculus period homolog 2 (Drosophila) (Per2), mRNA.                                                                                      |
| 0.001068 | 1.52E-05 | 2.0 | down | Scap          | 235623    | Mus musculus SREBF chaperone (Scap), mRNA.                                                                                                    |
| 0.002756 | 7.35E-05 | 2.0 | down | EG13909       | 13909     | Mus musculus predicted gene, EG13909 (EG13909), mRNA.                                                                                         |
| 2.04E-04 | 9.90E-07 | 1.9 | down | Cyp4v3        | 102294    | Mus musculus cytochrome P450, family 4, subfamily v, polypeptide 3 (Cyp4v3), mRNA.                                                            |
| 0.006448 | 3.05E-04 | 1.9 | down | EG13909       | 13909     | Mus musculus predicted gene, EG13909 (EG13909), mRNA.                                                                                         |
| 0.028296 | 0.003126 | 1.9 | down | Keg1          | 64697     | Mus musculus kidney expressed gene 1 (Keg1), mRNA.                                                                                            |
| 0.001796 | 3.49E-05 | 1.9 | down | A530050D06Rik | 104816    | Mus musculus RIKEN cDNA A530050D06 gene (A530050D06Rik), mRNA.                                                                                |
| 1.84E-05 | 1.47E-08 | 1.9 | down | LOC100046163  | 100046163 | PREDICTED: Mus musculus similar to Nme6 protein (LOC100046163), mRNA.                                                                         |
| 2.62E-04 | 1.56E-06 | 1.9 | down | Acat2         | 110460    | Mus musculus acetyl-Coenzyme A acetyltransferase 2 (Acat2), mRNA.                                                                             |

|          |          |     |      |           |        |                                                                                          |
|----------|----------|-----|------|-----------|--------|------------------------------------------------------------------------------------------|
| 0.007169 | 3.72E-04 | 1.9 | down | Dio1      | 13370  | Mus musculus deiodinase, iodothyronine, type I (Dio1), mRNA.                             |
| 0.001529 | 2.77E-05 | 1.9 | down | Tlcd2     | 380712 | Mus musculus TLC domain containing 2 (Tlcd2), mRNA.                                      |
| 9.80E-04 | 1.35E-05 | 1.9 | down | Pstpip2   | 19201  | Mus musculus proline-serine-threonine phosphatase-interacting protein 2 (Pstpip2), mRNA. |
| 0.007117 | 3.67E-04 | 1.9 | down | Fabp5     | 16592  | Mus musculus fatty acid binding protein 5, epidermal (Fabp5), mRNA.                      |
| 2.01E-04 | 9.56E-07 | 1.9 | down | LOC245069 |        |                                                                                          |
| 0.002592 | 6.64E-05 | 1.9 | down | Sc5d      |        |                                                                                          |
| 0.021797 | 0.002092 | 1.9 | down | Nsdhl     | 18194  | Mus musculus NAD(P) dependent steroid dehydrogenase-like (Nsdhl), mRNA.                  |
| 0.00646  | 3.08E-04 | 1.9 | down | Insig1    | 231070 | Mus musculus insulin induced gene 1 (Insig1), mRNA.                                      |
| 0.001888 | 3.90E-05 | 1.9 | down | Nudt7     |        |                                                                                          |
| 0.005425 | 2.31E-04 | 1.9 | down | Acss2     | 60525  | Mus musculus acyl-CoA synthetase short-chain family member 2 (Acss2), mRNA.              |
| 0.001504 | 2.68E-05 | 1.9 | down | Igfbp2    | 16008  | Mus musculus insulin-like growth factor binding protein 2 (Igfbp2), mRNA.                |
| 0.002046 | 4.47E-05 | 1.9 | down | Pdzk1ip1  | 67182  | Mus musculus PDZK1 interacting protein 1 (Pdzk1ip1), mRNA.                               |
| 1.30E-04 | 5.28E-07 | 1.9 | down | Gm2a      | 14667  | Mus musculus GM2 ganglioside activator protein (Gm2a), mRNA.                             |
| 1.12E-04 | 3.68E-07 | 1.9 | down | Cyp2u1    | 71519  | Mus musculus cytochrome P450, family 2, subfamily u, polypeptide 1 (Cyp2u1), mRNA.       |
| 0.014163 | 0.001075 | 1.8 | down | Cyp51     | 13121  | Mus musculus cytochrome P450, family 51 (Cyp51), mRNA.                                   |
| 0.028839 | 0.003223 | 1.8 | down | Nsdhl     | 18194  | Mus musculus NAD(P) dependent steroid dehydrogenase-like (Nsdhl), mRNA.                  |
| 5.22E-04 | 4.93E-06 | 1.8 | down | Hmgcr     | 15357  | Mus musculus 3-hydroxy-3-methylglutaryl-Coenzyme A reductase (Hmgcr), mRNA.              |
| 0.003067 | 8.93E-05 | 1.8 | down | H2-Ab1    | 14961  | Mus musculus histocompatibility 2, class II antigen A, beta 1 (H2-Ab1), mRNA.            |
| 0.004643 | 1.81E-04 | 1.8 | down | Ak2       | 11637  | Mus musculus adenylate kinase 2 (Ak2), transcript variant 1, mRNA.                       |
| 0.019667 | 0.001779 | 1.8 | down | Tuba6     |        |                                                                                          |
| 0.005025 | 2.05E-04 | 1.8 | down | Sdf2l1    | 64136  | Mus musculus stromal cell-derived factor 2-like 1 (Sdf2l1), mRNA.                        |
| 0.003527 | 1.15E-04 | 1.8 | down | Insig1    | 231070 | Mus musculus insulin induced gene 1 (Insig1), mRNA.                                      |
| 0.004881 | 1.95E-04 | 1.8 | down | Cyp2f2    | 13107  | Mus musculus cytochrome P450, family 2, subfamily f, polypeptide 2 (Cyp2f2), mRNA.       |

|          |          |     |      |               |           |                                                                                                                                                                 |
|----------|----------|-----|------|---------------|-----------|-----------------------------------------------------------------------------------------------------------------------------------------------------------------|
| 0.001842 | 3.70E-05 | 1.8 | down | Per2          | 18627     | Mus musculus period homolog 2 ( <i>Drosophila</i> ) ( <i>Per2</i> ), mRNA.                                                                                      |
| 2.54E-04 | 1.50E-06 | 1.8 | down | Gstm6         | 14867     | Mus musculus glutathione S-transferase, mu 6 ( <i>Gstm6</i> ), mRNA.                                                                                            |
| 0.008169 | 4.54E-04 | 1.8 | down | Cyp1a2        | 13077     | Mus musculus cytochrome P450, family 1, subfamily a, polypeptide 2 ( <i>Cyp1a2</i> ), mRNA.                                                                     |
| 3.24E-04 | 2.28E-06 | 1.8 | down | Mrap          | 77037     | Mus musculus melanocortin 2 receptor accessory protein ( <i>Mrap</i> ), mRNA.                                                                                   |
| 9.58E-04 | 1.27E-05 | 1.8 | down | Pnpla5        | 75772     | Mus musculus patatin-like phospholipase domain containing 5 ( <i>Pnpla5</i> ), mRNA.                                                                            |
| 2.50E-04 | 1.43E-06 | 1.8 | down | Gstm6         | 14867     | Mus musculus glutathione S-transferase, mu 6 ( <i>Gstm6</i> ), mRNA.                                                                                            |
| 9.16E-05 | 2.16E-07 | 1.8 | down | Tbcel         | 272589    | Mus musculus tubulin folding cofactor E-like ( <i>Tbcel</i> ), mRNA.                                                                                            |
| 6.29E-04 | 6.68E-06 | 1.8 | down | Klk1b4        | 18048     | Mus musculus kallikrein 1-related peptidase b4 ( <i>Klk1b4</i> ), mRNA.                                                                                         |
| 0.026541 | 0.002853 | 1.8 | down | Cd74          | 16149     | Mus musculus CD74 antigen (invariant polypeptide of major histocompatibility complex, class II antigen-associated) ( <i>Cd74</i> ), transcript variant 2, mRNA. |
| 0.026928 | 0.002915 | 1.8 | down | Lss           | 16987     | Mus musculus lanosterol synthase ( <i>Lss</i> ), mRNA.                                                                                                          |
| 0.003535 | 1.16E-04 | 1.8 | down | 2310045A20Rik | 231238    | Mus musculus RIKEN cDNA 2310045A20 gene ( <i>2310045A20Rik</i> ), mRNA.                                                                                         |
| 0.01719  | 0.001425 | 1.8 | down | LOC100040592  | 100040592 | PREDICTED: Mus musculus similar to Hmgcs1 protein, transcript variant 1 ( <i>LOC100040592</i> ), mRNA.                                                          |
| 0.006527 | 3.16E-04 | 1.8 | down | Acaa1b        | 235674    | Mus musculus acetyl-Coenzyme A acyltransferase 1B ( <i>Acaa1b</i> ), mRNA.                                                                                      |
| 0.018315 | 0.001591 | 1.8 | down | H2-Aa         | 14960     | Mus musculus histocompatibility 2, class II antigen A, alpha ( <i>H2-Aa</i> ), mRNA.                                                                            |
| 0.005012 | 2.04E-04 | 1.8 | down | Pgd           |           |                                                                                                                                                                 |
| 0.043749 | 0.005935 | 1.8 | down | Ugt2b1        | 71773     | Mus musculus UDP glucuronosyltransferase 2 family, polypeptide B1 ( <i>Ugt2b1</i> ), mRNA.                                                                      |
| 5.72E-04 | 5.64E-06 | 1.8 | down | Gstm6         |           |                                                                                                                                                                 |
| 0.005794 | 2.58E-04 | 1.8 | down | Dhcr7         | 13360     | Mus musculus 7-dehydrocholesterol reductase ( <i>Dhcr7</i> ), mRNA.                                                                                             |
| 0.005576 | 2.42E-04 | 1.8 | down | Dio1          | 13370     | Mus musculus deiodinase, iodothyronine, type I ( <i>Dio1</i> ), mRNA.                                                                                           |
| 0.004745 | 1.86E-04 | 1.8 | down | C9            | 12279     | Mus musculus complement component 9 ( <i>C9</i> ), mRNA.                                                                                                        |
| 0.034864 | 0.004239 | 1.8 | down | Upp2          | 76654     | Mus musculus uridine phosphorylase 2 ( <i>Upp2</i> ), mRNA.                                                                                                     |
| 9.58E-04 | 1.28E-05 | 1.7 | down | Gale          | 74246     | Mus musculus galactose-4-epimerase, UDP ( <i>Gale</i> ), mRNA.                                                                                                  |
| 0.02873  | 0.003198 | 1.7 | down | LOC669658     | 669658    | PREDICTED: Mus musculus similar to melanoma antigen ( <i>LOC669658</i> ), mRNA.                                                                                 |

|          |          |     |      |               |        |                                                                                                                                                        |
|----------|----------|-----|------|---------------|--------|--------------------------------------------------------------------------------------------------------------------------------------------------------|
| 0.014064 | 0.001062 | 1.7 | down | Susd4         | 96935  | Mus musculus sushi domain containing 4 (Susd4), mRNA.                                                                                                  |
| 1.12E-04 | 3.68E-07 | 1.7 | down | Abhd5         | 67469  | Mus musculus abhydrolase domain containing 5 (Abhd5), mRNA.                                                                                            |
| 1.94E-05 | 1.85E-08 | 1.7 | down | Rpia          | 19895  | Mus musculus ribose 5-phosphate isomerase A (Rpia), mRNA.                                                                                              |
| 1.21E-04 | 4.37E-07 | 1.7 | down | Reck          | 53614  | Mus musculus reversion-inducing-cysteine-rich protein with kazal motifs (Reck), mRNA.                                                                  |
| 0.002453 | 6.04E-05 | 1.7 | down | Xkr9          | 381246 | Mus musculus X Kell blood group precursor related family member 9 homolog (Xkr9), mRNA.                                                                |
| 0.040478 | 0.005281 | 1.7 | down | Crel2         | 76737  | Mus musculus cysteine-rich with EGF-like domains 2 (Crel2), mRNA.                                                                                      |
| 0.023091 | 0.002286 | 1.7 | down | Cyp1a2        | 13077  | Mus musculus cytochrome P450, family 1, subfamily a, polypeptide 2 (Cyp1a2), mRNA.                                                                     |
| 0.0126   | 8.91E-04 | 1.7 | down | Sc4mol        | 66234  | Mus musculus sterol-C4-methyl oxidase-like (Sc4mol), mRNA.                                                                                             |
| 0.005755 | 2.54E-04 | 1.7 | down | Aox3          | 71724  | Mus musculus aldehyde oxidase 3 (Aox3), mRNA.                                                                                                          |
| 6.31E-04 | 6.74E-06 | 1.7 | down | Cd8b          |        |                                                                                                                                                        |
| 5.11E-04 | 4.56E-06 | 1.7 | down | Paox          | 212503 | Mus musculus polyamine oxidase (exo-N4-amino) (Paox), mRNA.                                                                                            |
| 0.015148 | 0.001184 | 1.7 | down | Krt23         | 94179  | Mus musculus keratin 23 (Krt23), mRNA.                                                                                                                 |
| 0.039309 | 0.005063 | 1.7 | down | Cd74          | 16149  | Mus musculus CD74 antigen (invariant polypeptide of major histocompatibility complex, class II antigen-associated) (Cd74), transcript variant 1, mRNA. |
| 0.014932 | 0.001157 | 1.7 | down | Srebf1        | 20787  | Mus musculus sterol regulatory element binding factor 1 (Srebf1), mRNA.                                                                                |
| 0.016346 | 0.001328 | 1.7 | down | 2010305C02Rik |        |                                                                                                                                                        |
| 0.00282  | 7.62E-05 | 1.7 | down | 5730472N09Rik | 108958 | Mus musculus RIKEN cDNA 5730472N09 gene (5730472N09Rik), mRNA.                                                                                         |
| 0.002593 | 6.65E-05 | 1.7 | down | Cyb5r3        | 109754 | Mus musculus cytochrome b5 reductase 3 (Cyb5r3), mRNA.                                                                                                 |
| 9.11E-04 | 1.18E-05 | 1.7 | down | Rdbp          | 27632  | Mus musculus RD RNA-binding protein (Rdbp), transcript variant 3, mRNA.                                                                                |
| 0.013467 | 9.88E-04 | 1.7 | down | S100a10       | 20194  | Mus musculus S100 calcium binding protein A10 (calpactin) (S100a10), mRNA.                                                                             |
| 1.12E-04 | 3.77E-07 | 1.7 | down | Tssc1         | 380752 | Mus musculus tumor suppressing subtransferable candidate 1 (Tssc1), mRNA.                                                                              |
| 0.00714  | 3.69E-04 | 1.7 | down | Cyp2d9        | 13105  | Mus musculus cytochrome P450, family 2, subfamily d, polypeptide 9 (Cyp2d9), mRNA.                                                                     |
| 0.001919 | 4.06E-05 | 1.7 | down | Pdhb          | 68263  | Mus musculus pyruvate dehydrogenase (lipoamide) beta (Pdhb), mRNA.                                                                                     |

|          |          |     |      |               |        |                                                                                        |
|----------|----------|-----|------|---------------|--------|----------------------------------------------------------------------------------------|
| 0.004507 | 1.73E-04 | 1.7 | down | Gamt          | 14431  | Mus musculus guanidinoacetate methyltransferase (Gamt), mRNA.                          |
| 2.98E-04 | 1.97E-06 | 1.7 | down | 2900024O10Rik | 72852  | Mus musculus RIKEN cDNA 2900024O10 gene (2900024O10Rik), mRNA.                         |
| 0.005701 | 2.51E-04 | 1.6 | down | Ugt3a1        | 105887 | Mus musculus UDP glycosyltransferases 3 family, polypeptide A1 (Ugt3a1), mRNA.         |
| 0.001384 | 2.34E-05 | 1.6 | down | Paox          | 212503 | Mus musculus polyamine oxidase (exo-N4-amino) (Paox), mRNA.                            |
| 5.21E-04 | 4.79E-06 | 1.6 | down | Cyp2a5        | 13087  | Mus musculus cytochrome P450, family 2, subfamily a, polypeptide 5 (Cyp2a5), mRNA.     |
| 0.030371 | 0.003445 | 1.6 | down | H2-Ab1        | 14961  | Mus musculus histocompatibility 2, class II antigen A, beta 1 (H2-Ab1), mRNA.          |
| 0.009375 | 5.58E-04 | 1.6 | down | Edem2         | 108687 | Mus musculus ER degradation enhancer, mannosidase alpha-like 2 (Edem2), mRNA.          |
| 0.032973 | 0.003918 | 1.6 | down | Dclk3         | 245038 | Mus musculus doublecortin-like kinase 3 (Dclk3), mRNA.                                 |
| 0.015692 | 0.001253 | 1.6 | down | Rassf3        | 192678 | Mus musculus Ras association (RalGDS/AF-6) domain family member 3 (Rassf3), mRNA.      |
| 0.009041 | 5.25E-04 | 1.6 | down | Cs            | 12974  | Mus musculus citrate synthase (Cs), nuclear gene encoding mitochondrial protein, mRNA. |
| 0.004125 | 1.52E-04 | 1.6 | down | Pdhb          | 68263  | Mus musculus pyruvate dehydrogenase (lipoamide) beta (Pdhb), mRNA.                     |
| 0.021487 | 0.00203  | 1.6 | down | Gpr146        | 80290  | Mus musculus G protein-coupled receptor 146 (Gpr146), transcript variant 2, mRNA.      |
| 5.07E-04 | 4.45E-06 | 1.6 | down | 5730469M10Rik | 70564  | Mus musculus RIKEN cDNA 5730469M10 gene (5730469M10Rik), mRNA.                         |
| 0.00338  | 1.05E-04 | 1.6 | down | Ero1lb        | 67475  | Mus musculus ERO1-like beta ( <i>S. cerevisiae</i> ) (Ero1lb), mRNA.                   |
| 0.003816 | 1.34E-04 | 1.6 | down | Paox          | 212503 | Mus musculus polyamine oxidase (exo-N4-amino) (Paox), mRNA.                            |
| 0.001822 | 3.57E-05 | 1.6 | down | Ak2           | 11637  | Mus musculus adenylate kinase 2 (Ak2), transcript variant 2, mRNA.                     |
| 2.90E-04 | 1.83E-06 | 1.6 | down | AU018778      | 234564 | Mus musculus expressed sequence AU018778 (AU018778), mRNA.                             |
| 0.004256 | 1.60E-04 | 1.6 | down | Dak           | 225913 | Mus musculus dihydroxyacetone kinase 2 homolog (yeast) (Dak), mRNA.                    |
| 8.31E-04 | 1.03E-05 | 1.6 | down | Rnf103        | 22644  | Mus musculus ring finger protein 103 (Rnf103), mRNA.                                   |
| 0.007823 | 4.27E-04 | 1.6 | down | A730017D01Rik |        |                                                                                        |
| 0.005564 | 2.41E-04 | 1.6 | down | Pik3c2g       |        |                                                                                        |
| 0.004507 | 1.73E-04 | 1.6 | down | N6amt2        | 68043  | Mus musculus N-6 adenine-specific DNA methyltransferase 2 (putative) (N6amt2), mRNA.   |



|          |          |     |      |               |        |                                                                                                             |
|----------|----------|-----|------|---------------|--------|-------------------------------------------------------------------------------------------------------------|
| 0.037607 | 0.004744 | 1.6 | down | Creld2        | 76737  | Mus musculus cysteine-rich with EGF-like domains 2 (Creld2), mRNA.                                          |
| 0.009505 | 5.68E-04 | 1.6 | down | Cyb5r3        | 109754 | Mus musculus cytochrome b5 reductase 3 (Cyb5r3), mRNA.                                                      |
| 0.007947 | 4.35E-04 | 1.6 | down | Aldh1a7       | 26358  | Mus musculus aldehyde dehydrogenase family 1, subfamily A7 (Aldh1a7), mRNA.                                 |
| 0.001856 | 3.77E-05 | 1.6 | down | Sort1         | 20661  | Mus musculus sortilin 1 (Sort1), mRNA.                                                                      |
| 0.018411 | 0.001604 | 1.6 | down | 1810005K13Rik |        |                                                                                                             |
| 0.00899  | 5.18E-04 | 1.6 | down | Gpr110        |        |                                                                                                             |
| 0.00508  | 2.09E-04 | 1.6 | down | Ralgps1       |        |                                                                                                             |
| 0.018729 | 0.001656 | 1.6 | down | Hopx          | 74318  | Mus musculus HOP homeobox (Hopx), mRNA.                                                                     |
| 0.004976 | 2.03E-04 | 1.6 | down | Mlxipl        | 58805  | Mus musculus MLX interacting protein-like (Mlxipl), mRNA.                                                   |
| 0.008408 | 4.74E-04 | 1.6 | down | Oprs1         | 18391  | Mus musculus opioid receptor, sigma 1 (Oprs1), mRNA.                                                        |
| 7.47E-04 | 8.69E-06 | 1.6 | down | Thnsl2        | 232078 | Mus musculus threonine synthase-like 2 (bacterial) (Thnsl2), transcript variant 2, mRNA.                    |
| 0.003374 | 1.04E-04 | 1.6 | down | Dhrs7b        | 216820 | Mus musculus dehydrogenase/reductase (SDR family) member 7B (Dhrs7b), mRNA.                                 |
| 0.033284 | 0.00399  | 1.6 | down | LOC382092     |        |                                                                                                             |
| 0.006527 | 3.17E-04 | 1.6 | down | Pcsk9         | 100102 | Mus musculus proprotein convertase subtilisin/kexin type 9 (Pcsk9), mRNA.                                   |
| 0.001596 | 2.93E-05 | 1.6 | down | Fads2         |        |                                                                                                             |
| 6.39E-04 | 6.98E-06 | 1.6 | down | Chordc1       | 66917  | Mus musculus cysteine and histidine-rich domain (CHORD)-containing, zinc-binding protein 1 (Chordc1), mRNA. |
| 0.005946 | 2.70E-04 | 1.6 | down | Ak2           | 11637  | Mus musculus adenylate kinase 2 (Ak2), transcript variant 2, mRNA.                                          |
| 1.12E-04 | 3.57E-07 | 1.6 | down | Extl1         |        |                                                                                                             |
| 0.01254  | 8.84E-04 | 1.6 | down | Gale          | 74246  | Mus musculus galactose-4-epimerase, UDP (Gale), mRNA.                                                       |
| 0.011137 | 7.19E-04 | 1.6 | down | Dct           | 13190  | Mus musculus dopachrome tautomerase (Dct), mRNA.                                                            |
| 0.013198 | 9.57E-04 | 1.6 | down | Arsa          | 11883  | Mus musculus arylsulfatase A (Arsa), mRNA.                                                                  |
| 0.012467 | 8.70E-04 | 1.6 | down | Fam158a       | 85308  | Mus musculus family with sequence similarity 158, member A (Fam158a), mRNA.                                 |
| 9.60E-05 | 2.60E-07 | 1.6 | down | Ces5          | 234673 | Mus musculus carboxylesterase 5 (Ces5), mRNA.                                                               |
| 3.12E-04 | 2.12E-06 | 1.6 | down | Mocos         | 68591  | Mus musculus molybdenum cofactor sulfurase (Mocos), mRNA.                                                   |
| 0.045417 | 0.006285 | 1.6 | down | C9            | 12279  | Mus musculus complement component 9 (C9), mRNA.                                                             |

|          |          |     |      |                    |           |                                                                                                             |
|----------|----------|-----|------|--------------------|-----------|-------------------------------------------------------------------------------------------------------------|
| 0.006164 | 2.87E-04 | 1.6 | down | Acy3               | 71670     | Mus musculus aspartoacylase (aminoacylase) 3 (Acy3), mRNA.                                                  |
| 0.001971 | 4.25E-05 | 1.6 | down | Mup5               | 17844     | Mus musculus major urinary protein 5 (Mup5), mRNA.                                                          |
| 0.009044 | 5.27E-04 | 1.6 | down | Cyp2a5             | 13087     | Mus musculus cytochrome P450, family 2, subfamily a, polypeptide 5 (Cyp2a5), mRNA.                          |
| 0.042515 | 0.005687 | 1.6 | down | Abcg5              | 27409     | Mus musculus ATP-binding cassette, sub-family G (WHITE), member 5 (Abcg5), mRNA.                            |
| 0.012302 | 8.49E-04 | 1.6 | down | Clstn3             | 232370    | Mus musculus calyntenin 3 (Clstn3), mRNA.                                                                   |
| 0.001278 | 2.08E-05 | 1.6 | down | Elov6              | 170439    | Mus musculus ELOVL family member 6, elongation of long chain fatty acids (yeast) (Elov6), mRNA.             |
| 0.001948 | 4.15E-05 | 1.6 | down | Sfrs17b            | 338351    | Mus musculus splicing factor, arginine/serine-rich 17b (Sfrs17b), mRNA.                                     |
| 1.60E-04 | 7.02E-07 | 1.6 | down | Rnf6               | 74132     | Mus musculus ring finger protein (C3H2C3 type) 6 (Rnf6), mRNA.                                              |
| 0.008017 | 4.41E-04 | 1.6 | down | Gstm4              | 14865     | Mus musculus glutathione S-transferase, mu 4 (Gstm4), mRNA.                                                 |
| 0.001529 | 2.77E-05 | 1.6 | down | Rnpep              |           |                                                                                                             |
| 0.004256 | 1.60E-04 | 1.5 | down | Tiam2              | 24001     | Mus musculus T-cell lymphoma invasion and metastasis 2 (Tiam2), mRNA.                                       |
| 9.38E-04 | 1.23E-05 | 1.5 | down | Sp5                | 64406     | Mus musculus trans-acting transcription factor 5 (Sp5), mRNA.                                               |
| 0.001864 | 3.80E-05 | 1.5 | down | Hapln4             | 330790    | Mus musculus hyaluronan and proteoglycan link protein 4 (Hapln4), mRNA.                                     |
| 0.02371  | 0.002387 | 1.5 | down | 4432416J03Rik      | 78252     | Mus musculus RIKEN cDNA 4432416J03 gene (4432416J03Rik), mRNA.                                              |
| 0.02074  | 0.001934 | 1.5 | down | Pmvk               | 68603     | Mus musculus phosphomevalonate kinase (Pmvk), mRNA.                                                         |
| 0.003066 | 8.91E-05 | 1.5 | down | Nsdhl              | 18194     | Mus musculus NAD(P) dependent steroid dehydrogenase-like (Nsdhl), mRNA.                                     |
| 0.020877 | 0.001952 | 1.5 | down | Mrps6              | 121022    | Mus musculus mitochondrial ribosomal protein S6 (Mrps6), nuclear gene encoding mitochondrial protein, mRNA. |
| 0.001806 | 3.53E-05 | 1.5 | down | OTTMUSG00000004551 | 100038514 | PREDICTED: Mus musculus predicted gene, OTTMUSG00000004551 (OTTMUSG00000004551), mRNA.                      |
| 6.29E-04 | 6.54E-06 | 1.5 | down | Rnpep              | 215615    | Mus musculus arginyl aminopeptidase (aminopeptidase B) (Rnpep), mRNA.                                       |
| 0.006522 | 3.14E-04 | 1.5 | down | Sort1              | 20661     | Mus musculus sortilin 1 (Sort1), mRNA.                                                                      |
| 0.002147 | 4.84E-05 | 1.5 | down | Uso1               | 56041     | Mus musculus USO1 homolog, vesicle docking protein (yeast) (Uso1), mRNA.                                    |
| 0.002719 | 7.18E-05 | 1.5 | down | Khk                | 16548     | Mus musculus ketohexokinase (Khk), mRNA.                                                                    |

|          |          |     |      |               |        |                                                                                                                                    |
|----------|----------|-----|------|---------------|--------|------------------------------------------------------------------------------------------------------------------------------------|
| 0.00685  | 3.47E-04 | 1.5 | down | BC048644      | 407789 | Mus musculus cDNA sequence BC048644 (BC048644), mRNA.                                                                              |
| 0.003063 | 8.75E-05 | 1.5 | down | Hspb1         | 15507  | Mus musculus heat shock protein 1 (Hspb1), mRNA.                                                                                   |
| 0.003779 | 1.31E-04 | 1.5 | down | C77080        |        |                                                                                                                                    |
| 4.95E-04 | 4.26E-06 | 1.5 | down | Dhrs7b        | 216820 | Mus musculus dehydrogenase/reductase (SDR family) member 7B (Dhrs7b), mRNA.                                                        |
| 0.006952 | 3.54E-04 | 1.5 | down | Fkbp4         | 14228  | Mus musculus FK506 binding protein 4 (Fkbp4), mRNA.                                                                                |
| 7.95E-04 | 9.64E-06 | 1.5 | down | Ergic1        | 67458  | Mus musculus endoplasmic reticulum-golgi intermediate compartment (ERGIC) 1 (Ergic1), mRNA.                                        |
| 8.24E-05 | 1.82E-07 | 1.5 | down | Slc25a37      | 67712  | Mus musculus solute carrier family 25, member 37 (Slc25a37), nuclear gene encoding mitochondrial protein, mRNA.                    |
| 2.13E-04 | 1.09E-06 | 1.5 | down | Abcf2         | 27407  | Mus musculus ATP-binding cassette, sub-family F (GCN20), member 2 (Abcf2), nuclear gene encoding mitochondrial protein, mRNA.      |
| 0.00283  | 7.66E-05 | 1.5 | down | Dexi          | 58239  | Mus musculus dexamethasone-induced transcript (Dexi), mRNA.                                                                        |
| 7.20E-04 | 8.26E-06 | 1.5 | down | Ecsit         | 26940  | Mus musculus ECSIT homolog (Drosophila) (Ecsit), mRNA.                                                                             |
| 5.25E-04 | 5.01E-06 | 1.5 | down | Letm1         | 56384  | Mus musculus leucine zipper-EF-hand containing transmembrane protein 1 (Letm1), nuclear gene encoding mitochondrial protein, mRNA. |
| 0.003901 | 1.40E-04 | 1.5 | down | Txn14         |        |                                                                                                                                    |
| 0.007541 | 4.04E-04 | 1.5 | down | Hyou1         | 12282  | Mus musculus hypoxia up-regulated 1 (Hyou1), mRNA.                                                                                 |
| 0.002661 | 6.93E-05 | 1.5 | down | Srm           | 20810  | Mus musculus spermidine synthase (Srm), mRNA.                                                                                      |
| 8.32E-05 | 1.92E-07 | 1.5 | down | Mscp          |        |                                                                                                                                    |
| 0.003311 | 1.01E-04 | 1.5 | down | 6430706D22Rik | 381280 | Mus musculus RIKEN cDNA 6430706D22 gene (6430706D22Rik), mRNA.                                                                     |
| 6.54E-04 | 7.21E-06 | 1.5 | down | Gas7          | 14457  | Mus musculus growth arrest specific 7 (Gas7), mRNA.                                                                                |
| 0.004472 | 1.70E-04 | 1.5 | down | Slc6a9        | 14664  | Mus musculus solute carrier family 6 (neurotransmitter transporter, glycine), member 9 (Slc6a9), mRNA.                             |
| 0.018553 | 0.001629 | 1.5 | down | Es22          | 13897  | Mus musculus esterase 22 (Es22), mRNA.                                                                                             |
| 0.009842 | 5.95E-04 | 1.5 | down | Fn3k          | 63828  | Mus musculus fructosamine 3 kinase (Fn3k), transcript variant 1, mRNA.                                                             |
| 0.001466 | 2.58E-05 | 1.5 | down | 3000003G13Rik |        |                                                                                                                                    |
| 7.57E-04 | 8.88E-06 | 1.5 | down | Dis3l2        | 208718 | Mus musculus DIS3 mitotic control homolog ( <i>S. cerevisiae</i> )-like 2 (Dis3l2), mRNA.                                          |

|          |          |     |      |               |        |                                                                                                                                  |
|----------|----------|-----|------|---------------|--------|----------------------------------------------------------------------------------------------------------------------------------|
| 0.007741 | 4.20E-04 | 1.5 | down | Slc1a2        | 20511  | Mus musculus solute carrier family 1 (glial high affinity glutamate transporter), member 2 (Slc1a2), transcript variant 3, mRNA. |
| 0.003901 | 1.40E-04 | 1.5 | down | AW061290      | 381110 | Mus musculus expressed sequence AW061290 (AW061290), mRNA.                                                                       |
| 0.023012 | 0.002275 | 1.5 | down | Pdcd4         | 18569  | Mus musculus programmed cell death 4 (Pdcd4), mRNA.                                                                              |
| 0.001711 | 3.31E-05 | 1.5 | down | Coasy         | 71743  | Mus musculus Coenzyme A synthase (Coasy), nuclear gene encoding mitochondrial protein, mRNA.                                     |
| 3.27E-04 | 2.33E-06 | 1.5 | down | Khk           | 16548  | Mus musculus ketohexokinase (Khk), mRNA.                                                                                         |
| 0.004071 | 1.49E-04 | 1.5 | down | Acsl5         | 433256 | Mus musculus acyl-CoA synthetase long-chain family member 5 (Acsl5), mRNA.                                                       |
| 0.002659 | 6.92E-05 | 1.5 | down | 0610012H03Rik | 74088  | Mus musculus RIKEN cDNA 0610012H03 gene (0610012H03Rik), mRNA.                                                                   |
| 0.001455 | 2.52E-05 | 1.5 | down | Pcca          | 110821 | Mus musculus propionyl-Coenzyme A carboxylase, alpha polypeptide (Pcca), mRNA.                                                   |
| 0.031502 | 0.003653 | 1.5 | down | Abcd3         | 19299  | Mus musculus ATP-binding cassette, sub-family D (ALD), member 3 (Abcd3), mRNA.                                                   |
| 0.027191 | 0.002954 | 1.5 | down | Aqp4          | 11829  | Mus musculus aquaporin 4 (Aqp4), mRNA.                                                                                           |
| 3.08E-04 | 2.08E-06 | 1.5 | down | Cyb5r3        | 109754 | Mus musculus cytochrome b5 reductase 3 (Cyb5r3), mRNA.                                                                           |
