# Supplementary material for: Pathogenesis of FOLFOX induced sinusoidal obstruction syndrome in a murine chemotherapy model
Source: PubMed Central journal article supplement (PMC3710969; doi:10.1016/j.jhep.2013.04.014), 2013-08
Supplement: mmc12.pdf [file mmc12.pdf]

| Entrez ID | Gene Name                                                                                                   | Fold Change (FOLFOX vs. Control) | p Value |
|-----------|-------------------------------------------------------------------------------------------------------------|----------------------------------|---------|
| 20201     | Mus musculus S100 calcium binding protein A8 (calgranulin A) (S100a8), mRNA.                                | 41                               | <0.001  |
| 17748     | Mus musculus metallothionein 1 (Mt1), mRNA.                                                                 | 22                               | <0.001  |
|           | Apolipoprotein A-IV                                                                                         | 20                               | <0.001  |
| 20202     | Mus musculus S100 calcium binding protein A9 (calgranulin B) (S100a9), mRNA.                                | 79                               | <0.001  |
| 12575     | Mus musculus cyclin-dependent kinase inhibitor 1A (P21) (Cdkn1a), mRNA.                                     | 21                               | <0.001  |
| 13074     | Mus musculus cytochrome P450, family 17, subfamily a, polypeptide 1 (Cyp17a1), mRNA.                        | 9                                | <0.001  |
| 216233    | Mus musculus suppressor of cytokine signaling 2 (Socs2), mRNA.                                              | 6                                | <0.001  |
| 13118     | Mus musculus cytochrome P450, family 4, subfamily a, polypeptide 12B (Cyp4a12b), mRNA.                      | 0.2                              | <0.001  |
| 12686     | Mus musculus elongation of very long chain fatty acids (FEN1/Elo2, SUR4/Elo3, yeast)-like 3 (Elovl3), mRNA. | 0.2                              | <0.001  |
| 21835     | Mus musculus thyroid hormone responsive SPOT14 homolog (Rattus) (Thrsp), mRNA.                              | 0.1                              | <0.001  |
| 277753    | Mus musculus cytochrome P450, family 4, subfamily a, polypeptide 12a (Cyp4a12a), mRNA.                      | 0.3                              | <0.001  |
| 13087     | Mus musculus cytochrome P450, family 2, subfamily a, polypeptide 5 (Cyp2a5), mRNA.                          | 0.1                              | <0.001  |
| 170439    | Mus musculus ELOVL family member 6, elongation of long chain fatty acids (yeast) (Elovl6), mRNA.            | 0.2                              | <0.001  |
| 55927     | Mus musculus hairy and enhancer of split 6 (Drosophila) (Hes6), mRNA.                                       | 0.3                              | <0.001  |
