# Supplementary material for: Pathogenesis of FOLFOX induced sinusoidal obstruction syndrome in a murine chemotherapy model
Source: PubMed Central journal article supplement (PMC3710969; doi:10.1016/j.jhep.2013.04.014), 2013-08
Supplement: mmc13.pdf [file mmc13.pdf]

|                              | <b>Gene</b>                        | <b>Fold Change (FOLFOX vs. Vehicle)</b> |
|------------------------------|------------------------------------|-----------------------------------------|
| <b>Cell Cycle Regulation</b> | <i>Cdkn1a (p21<sup>Cip1</sup>)</i> | + 8.2                                   |
|                              | <i>CXCL1</i>                       | + 3.3                                   |
|                              | <i>GADD45G</i>                     | + 2.6                                   |
|                              | <i>KLF6</i>                        | + 2.3                                   |
|                              | <i>STAT3</i>                       | + 1.8                                   |
|                              | <i>Gas6</i>                        | + 1.7                                   |
|                              | <i>GADD45B</i>                     | + 1.7                                   |
|                              | <i>Bax</i>                         | + 1.6                                   |
|                              | <i>Ccng1</i>                       | + 1.5                                   |
|                              | <i>Gas7</i>                        | - 1.5                                   |
| <b>Oxidative Stress</b>      | <i>Mt1</i>                         | + 12.4                                  |
|                              | <i>Hmox1</i>                       | + 2.4                                   |
|                              | <i>Gpx3</i>                        | + 2.0                                   |
|                              | <i>Mgst3</i>                       | + 1.7                                   |
|                              | <i>Sod3</i>                        | + 1.6                                   |
|                              | <i>Gstp1</i>                       | - 2.3                                   |
|                              | <i>Gstm6</i>                       | - 1.8                                   |
|                              | <i>Gstm4</i>                       | - 1.6                                   |
| <b>Angiogenesis</b>          | <i>Angptl3</i>                     | + 3.3                                   |
|                              | <i>Fgf1</i>                        | + 2.0                                   |
|                              | <i>Ang</i>                         | + 1.5                                   |
|                              | <i>Flt1</i>                        | + 1.5                                   |
| <b>Coagulation</b>           | <i>Cxcl9</i>                       | + 2.1                                   |
|                              | <i>Vwf</i>                         | + 1.6                                   |
| <b>Matrix Remodelling</b>    | <i>Mmp14</i>                       | + 2.0                                   |
|                              | <i>Col6a1</i>                      | + 1.9                                   |
|                              | <i>Col4a1</i>                      | + 1.8                                   |
|                              | <i>Col4a2</i>                      | + 1.5                                   |

**Supplementary Table 7. Summary of genes implicated in key enriched pathways**
