# Supplementary material for: Pathogenesis of FOLFOX induced sinusoidal obstruction syndrome in a murine chemotherapy model
Source: PubMed Central journal article supplement (PMC3710969; doi:10.1016/j.jhep.2013.04.014), 2013-08
Supplement: mmc14.pdf [file mmc14.pdf]

|                                       | Control Diet     |                 | 0.7% BHA         |                 |
|---------------------------------------|------------------|-----------------|------------------|-----------------|
|                                       | Vehicle<br>(n=5) | FOLFOX<br>(n=5) | Vehicle<br>(n=5) | FOLFOX<br>(n=4) |
| <b>Rubbia-Brandt Grade</b>            |                  |                 |                  |                 |
| 0                                     | 5                | 0               | 5                | 1               |
| 1                                     | 0                | 4               | 0                | 3               |
| 2                                     | 0                | 1               | 0                | 0               |
| 3                                     | 0                | 0               | 0                | 0               |
| <b>Endothelial Disruption Present</b> | 0                | 5               | 0                | 1*              |

\*p<0.05, Fishers exact test control diet FOLFOX vs. BHA diet FOLFOX

**Supplementary Table 8. The effect of BHA treatment of histological scoring of liver injury**
